# Supplementary material
Source: Research Square preprint supplement (doi:10.21203/rs.3.rs-8797160/v1)
Supplement: Supplementary file 2 [file 43b560fe8c7e738bb47fecb5.docx]

**Table S1. Sequence identity of internal gene segments between CIV-GD06 and related AIV isolates.**

| Segments | GenBank Title | Accession | Identity |
| --- | --- | --- | --- |
| PB2 | A/duck/Beijing/40/04(H3N8) | EU492488.1 | 97.81% |
|  | A/duck/Beijing/61/05(H3N8) | EU492492.1 | 97.76% |
|  | A/duck/Kinmen/05WB11-808-16-20-E1/2005(H4N3) | OR949817.1 | 97.50% |
|  | A/duck/Eastern China/50/2002(H6N8) | JF965038.1 | 97.50% |
|  | A/whooper swan/Mongolia/1-14/2007(H3N8) | JN029547.2 | 97.50% |
| PB1 | A/mallard/Huadong/S/2005(H5N1) | EU195390.1 | 98.64% |
|  | A/duck/Taiwan/4201/99(H7N7) | LC498510.1 | 97.85% |
|  | A/duck/Hokkaido/228/2003(H6N8) | LC371832.1 | 97.85% |
|  | A/duck/Hokkaido/W132/2004(H12N5) | LC339601.1 | 97.80% |
|  | A/duck/Shiga/8/2004(H4N6) | AB304145.1 | 97.71% |
| PA | A/duck/Hokkaido/101/2001(H6N2) | LC431423.1 | 98.23% |
|  | A/duck/Hokkaido/95/2001(H2N2) | LC371841.1 | 98.23% |
|  | A/migratory duck/Hong Kong/MP2553/2003(H8N4) | EF597425.2 | 98.23% |
|  | A/duck/Hokkaido/120/2001(H6N2) | AB286878.1 | 98.14% |
|  | A/white peckin duck/South Korea/N07-0078/2007(H3N2) | MN530312.1 | 97.72% |
| NP | A/duck/Jiangsu/4/2010(H3N6) | KC261678.1 | 97.06% |
|  | A/mallard/Jiangxi/8346/2004(H6N5) | HM145212.1 | 96.99% |
|  | A/duck/Hokkaido/W34/2004(H7N7) | MK978881.1 | 96.86% |
|  | A/mallard/Jiangxi/8341/2004(H6N5) | HM145211.1 | 96.86% |
|  | A/spotbill duck/Xuyi/6/2005(H11N2) | GQ169500.1 | 96.86% |
| M | A/duck/Hokkaido/W87/2007(H10N2) | MK978899.1 | 98.52% |
|  | A/duck/Hokkaido/221/2008(H3N6) | LC371829.1 | 98.52% |
|  | A/gull/Astrakhan/1846/1998(H13N6) | GU052229.1 | 98.50% |
|  | A/duck/Hokkaido/67/2008(H3N2) | AB787283.1 | 98.49% |
|  | A/duck/Mongolia/54/01-duck/Mongolia/47/01(H5N1) | AB263195.1 | 98.49% |
| NS | A/Chicken/Nanchang/7-010/2000(H3N6) | CY005450.1 | 95.82% |
|  | A/mallard/Sweden/52484/2006(H4N6) | CY164989.1 | 95.58% |
|  | A/mallard/Sweden/52039/2006(H4N6) | CY164826.1 | 95.58% |
|  | A/mallard/Sweden/5812/2005(H10N9) | CY183681.1 | 95.47% |
|  | A/mallard/Sweden/52134/2006(H4N6) | CY164858.1 | 95.47% |

The table lists the top five AIV strains exhibiting the highest nucleotide sequence identity to the PB2, PB1, PA, NP, M, and NS gene segments of the index H3N2 CIV isolate (CIV-GD06). For each segment, the strains are ranked based on their sequence homology to the canine precursor.
