# Supplementary material
Source: Research Square preprint supplement (doi:10.21203/rs.3.rs-8797160/v1)
Supplement: Supplementary file 4 [file b7b1eb6eea330c940a460722.docx]

A


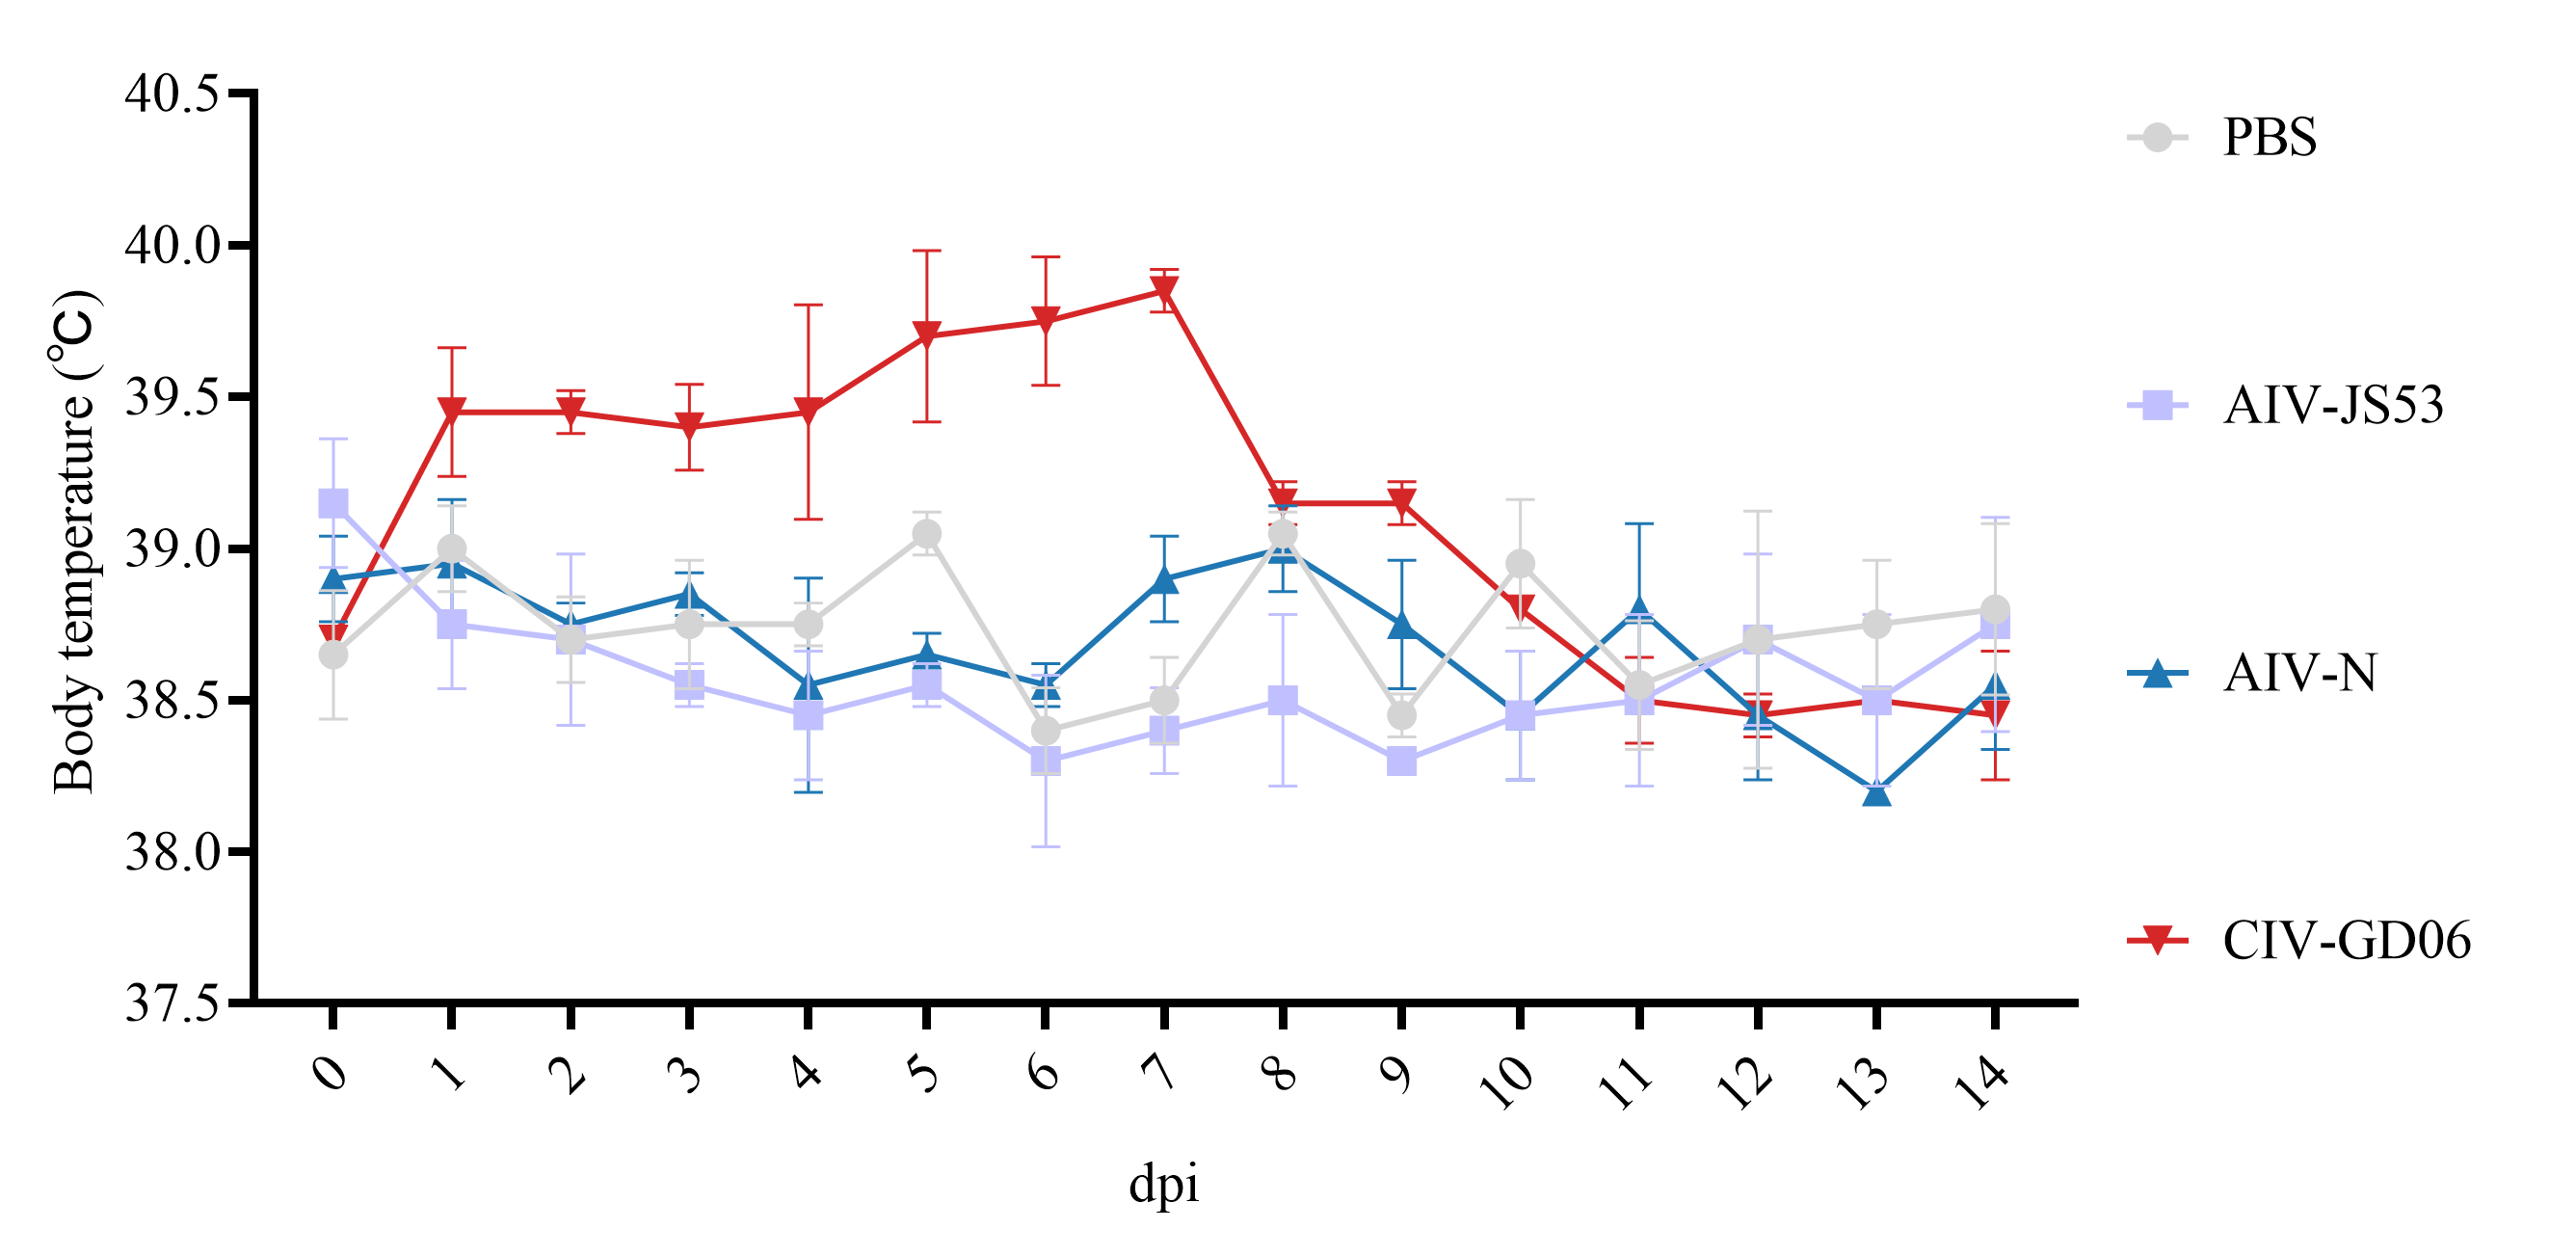


B


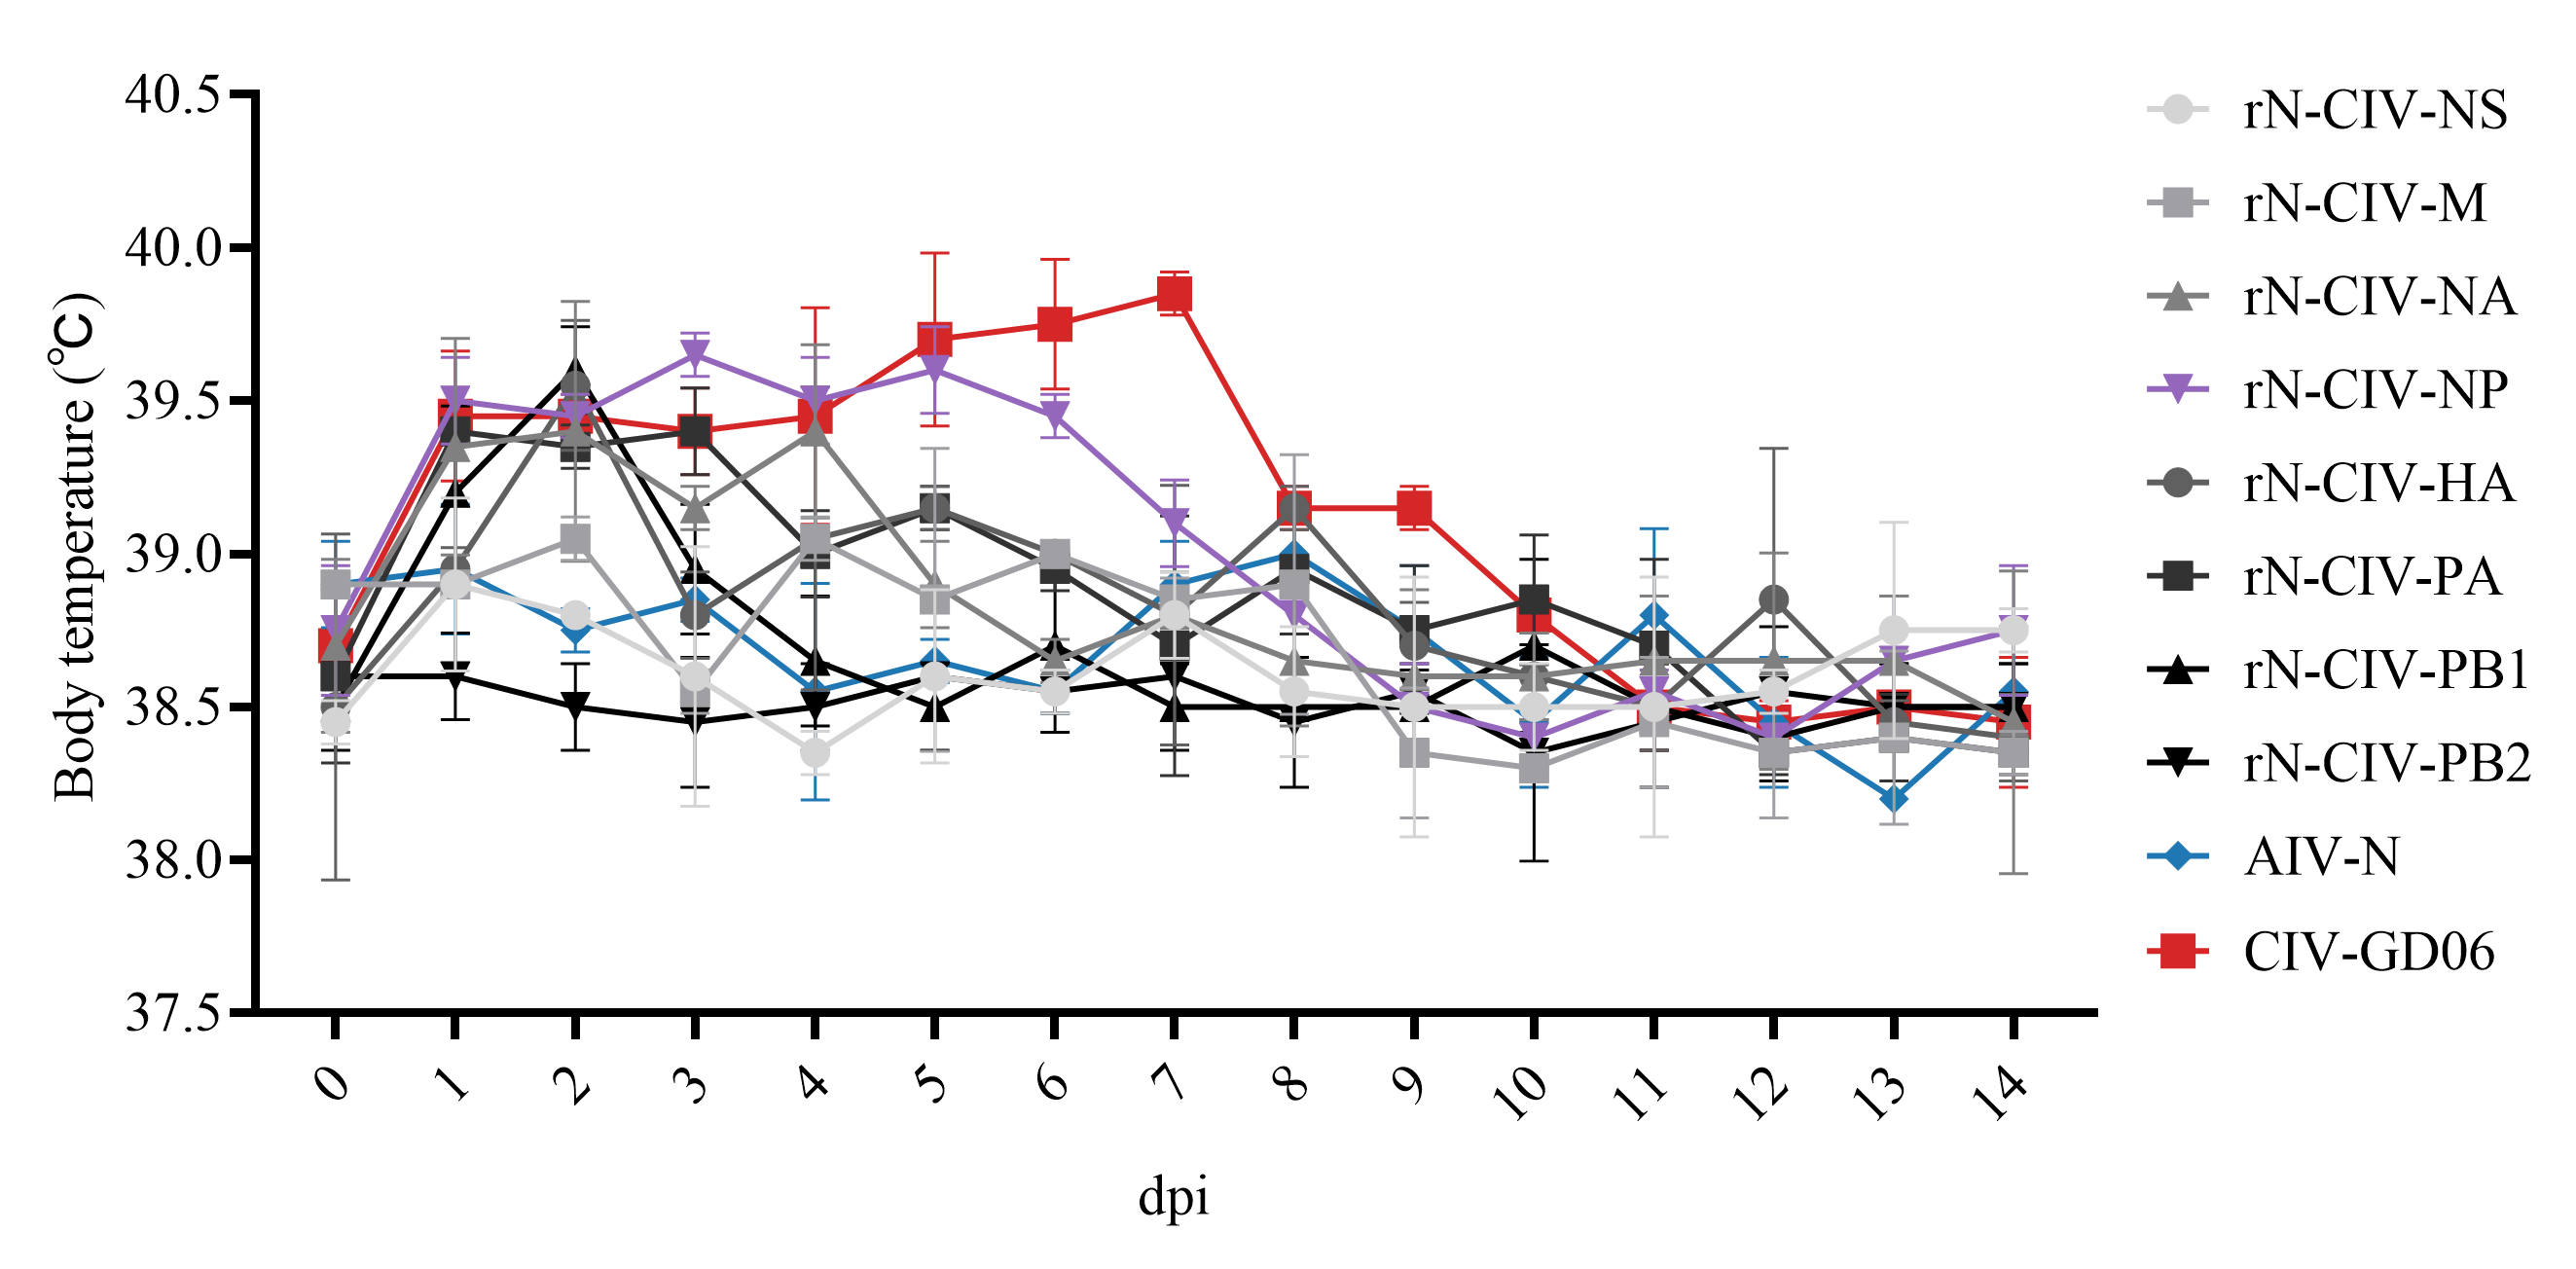


C


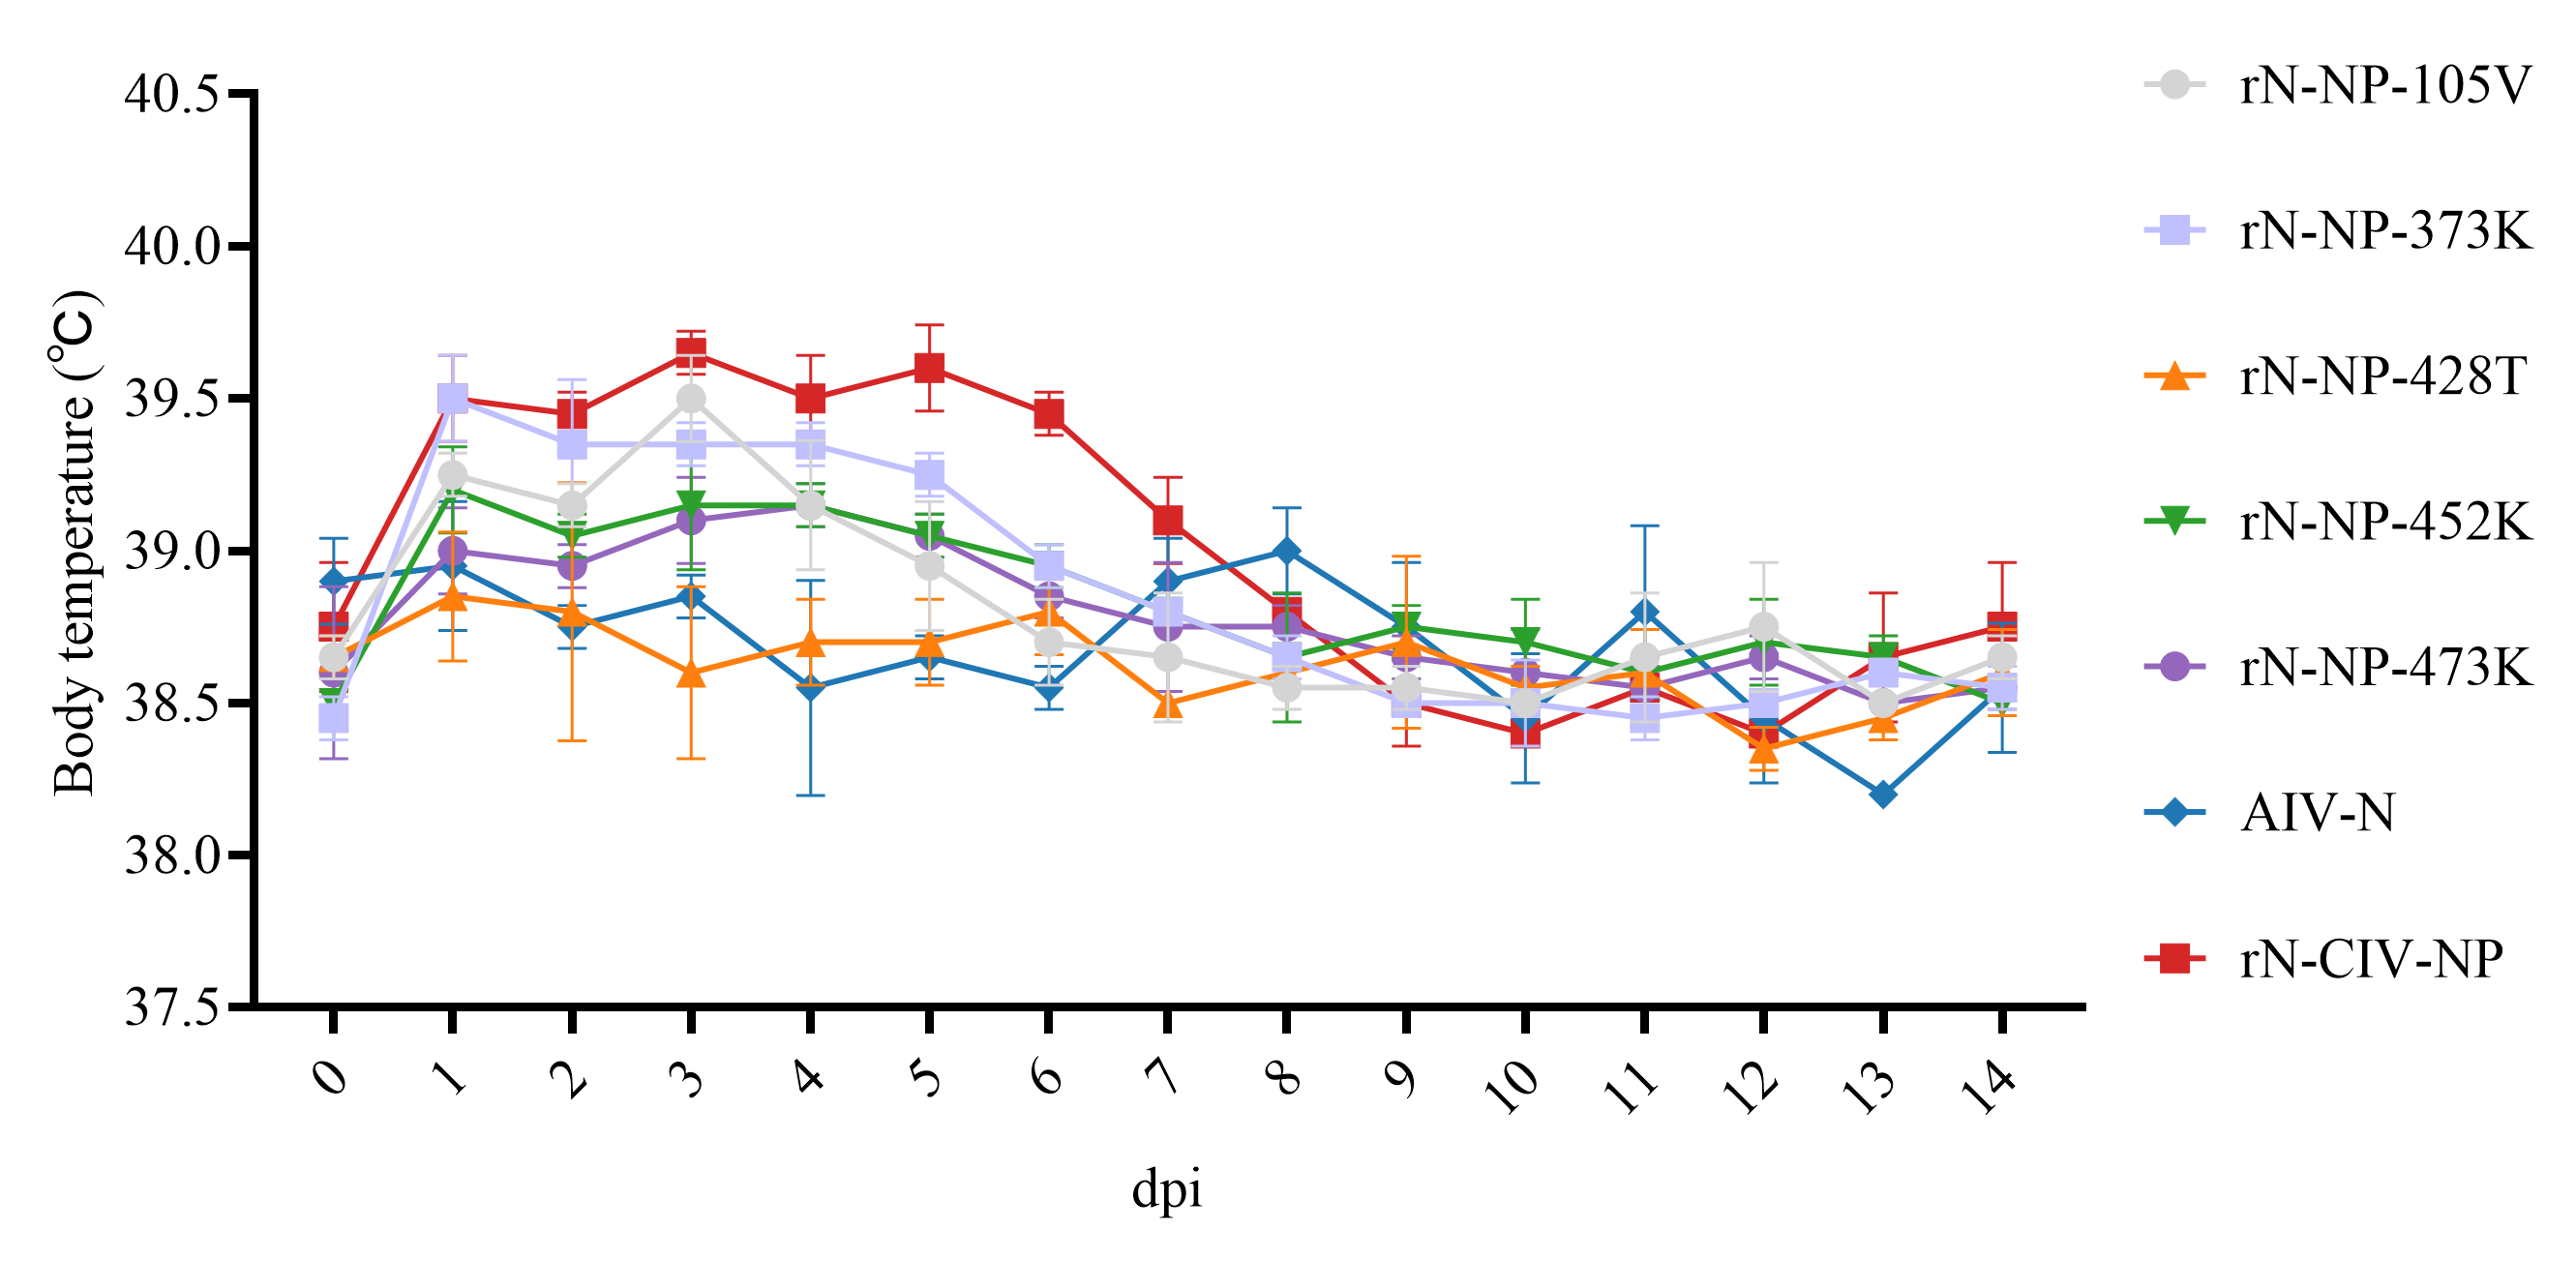


D


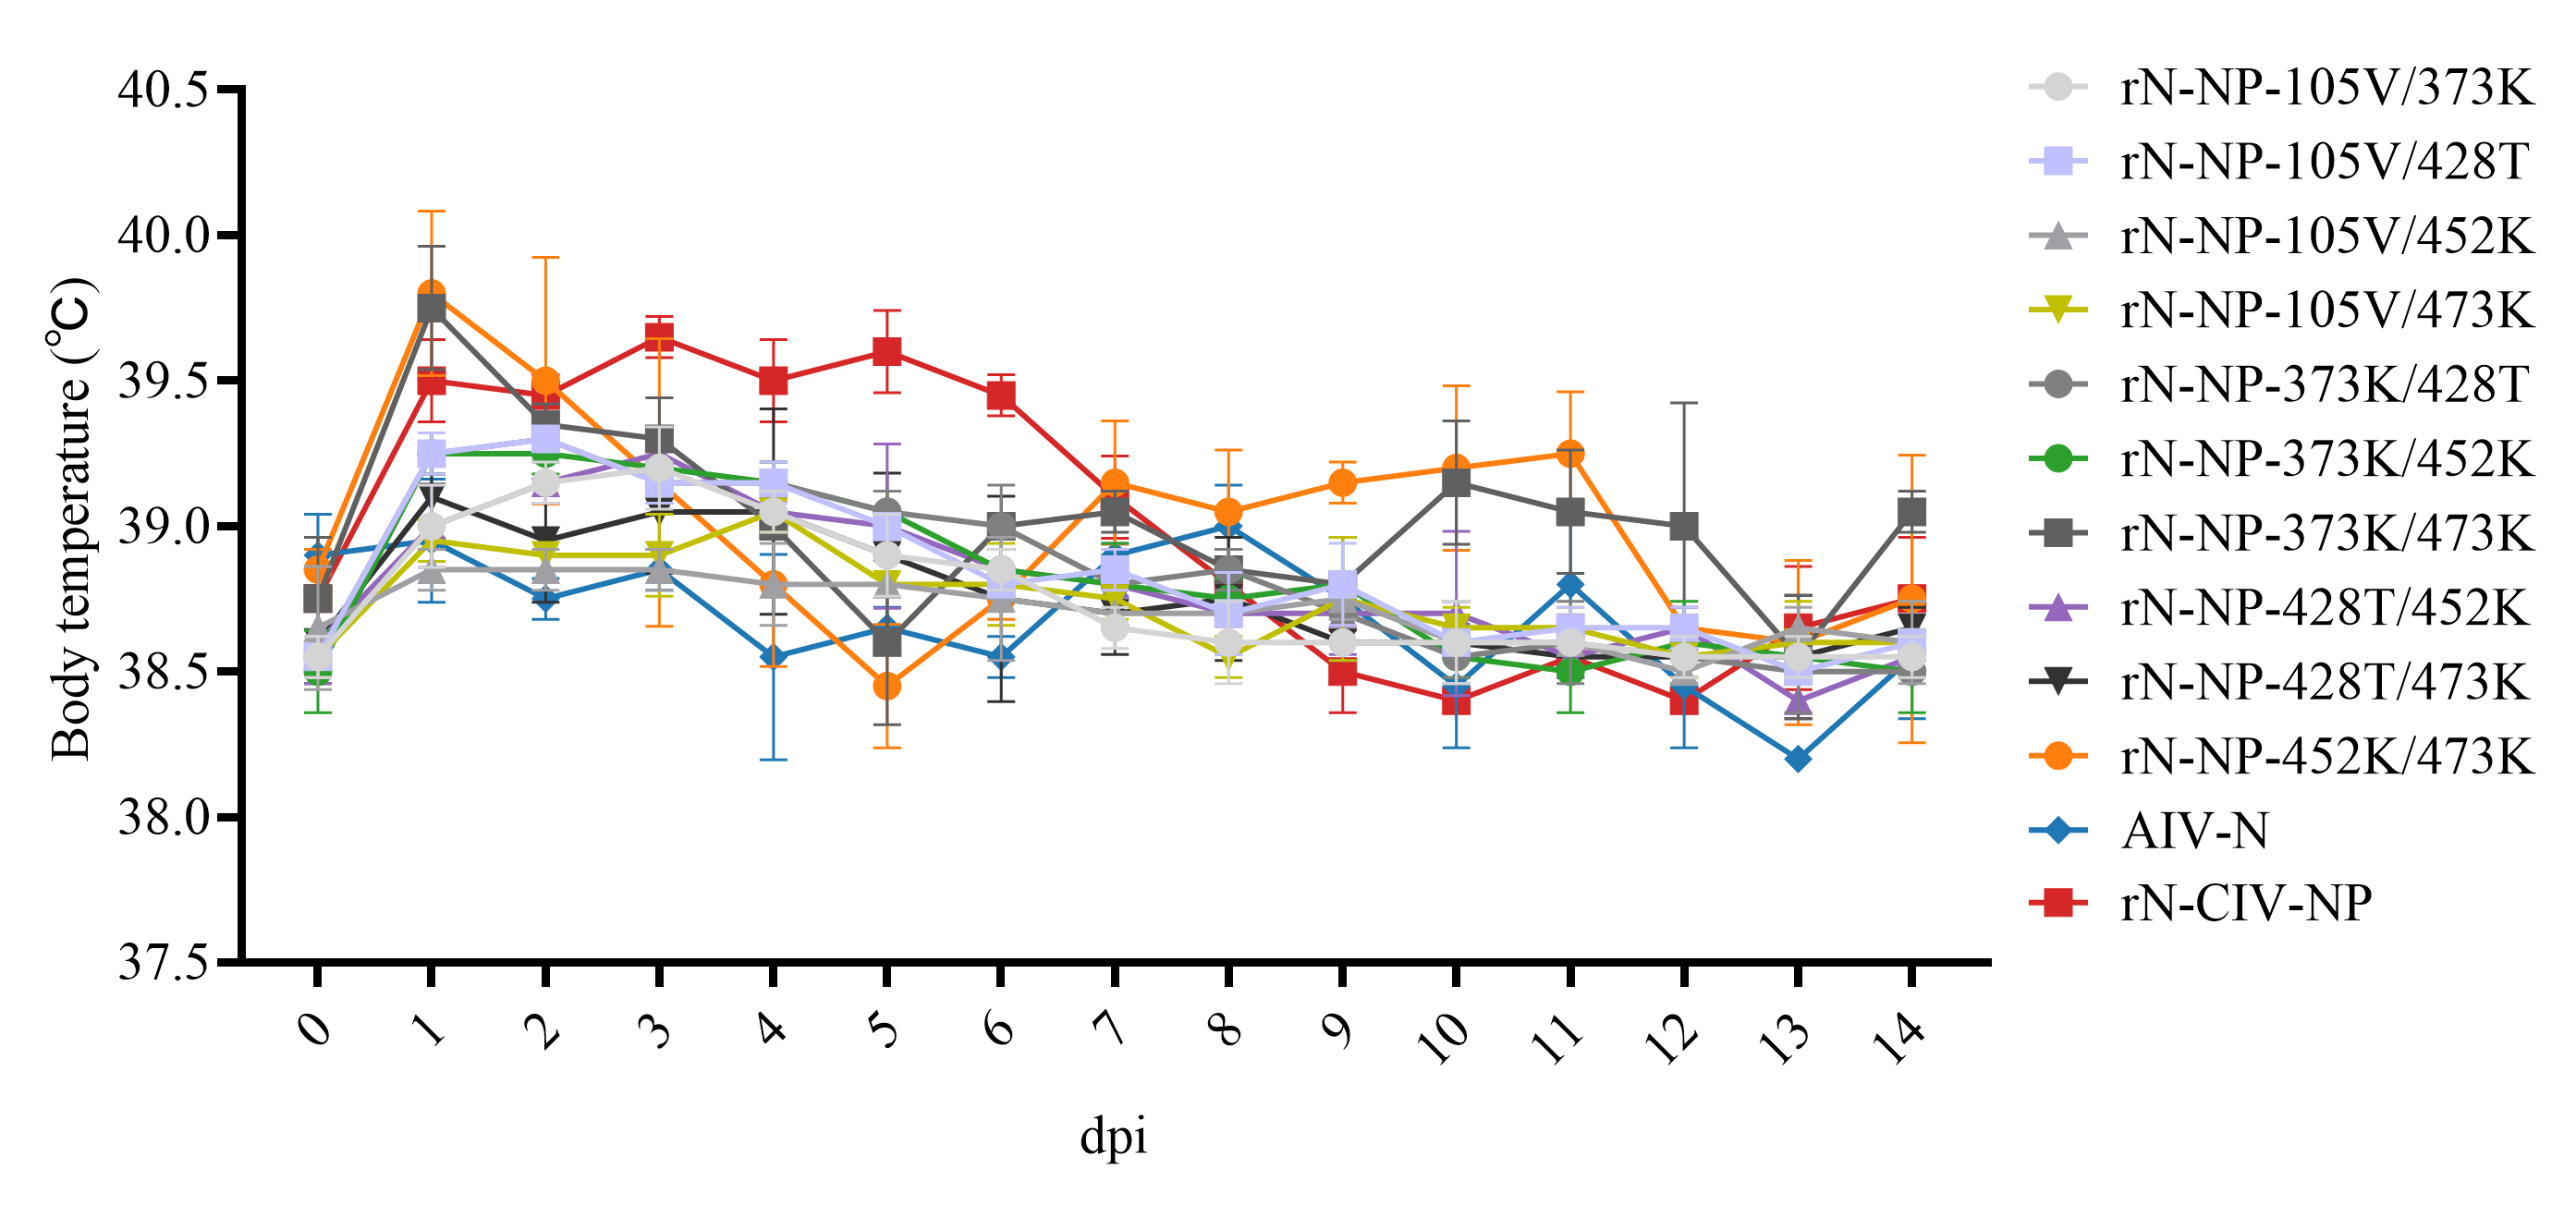


E


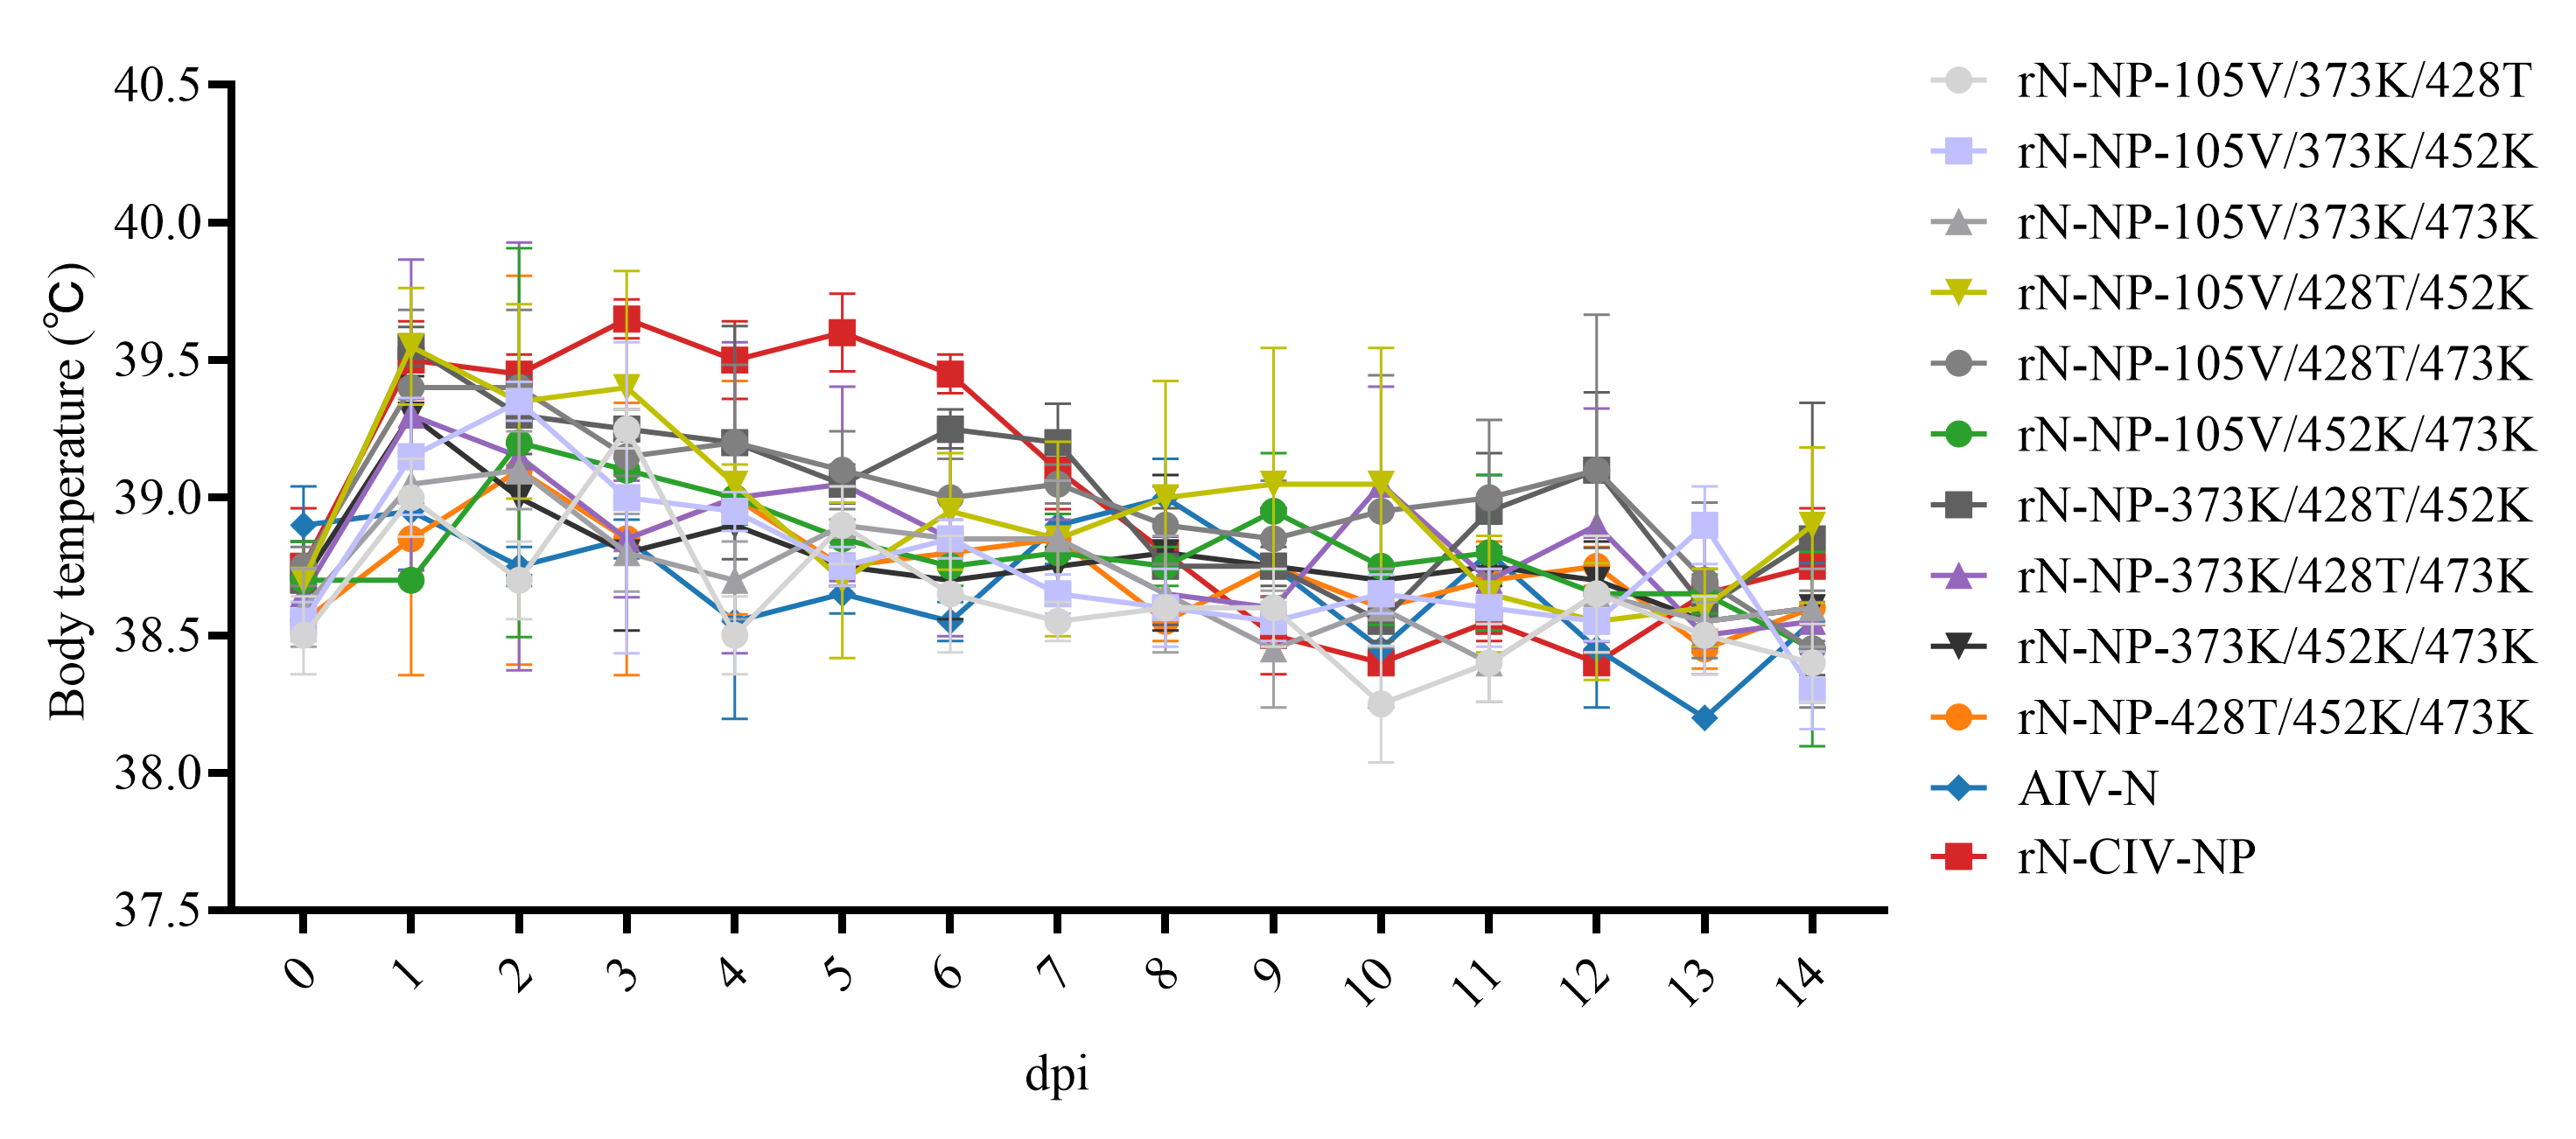


F


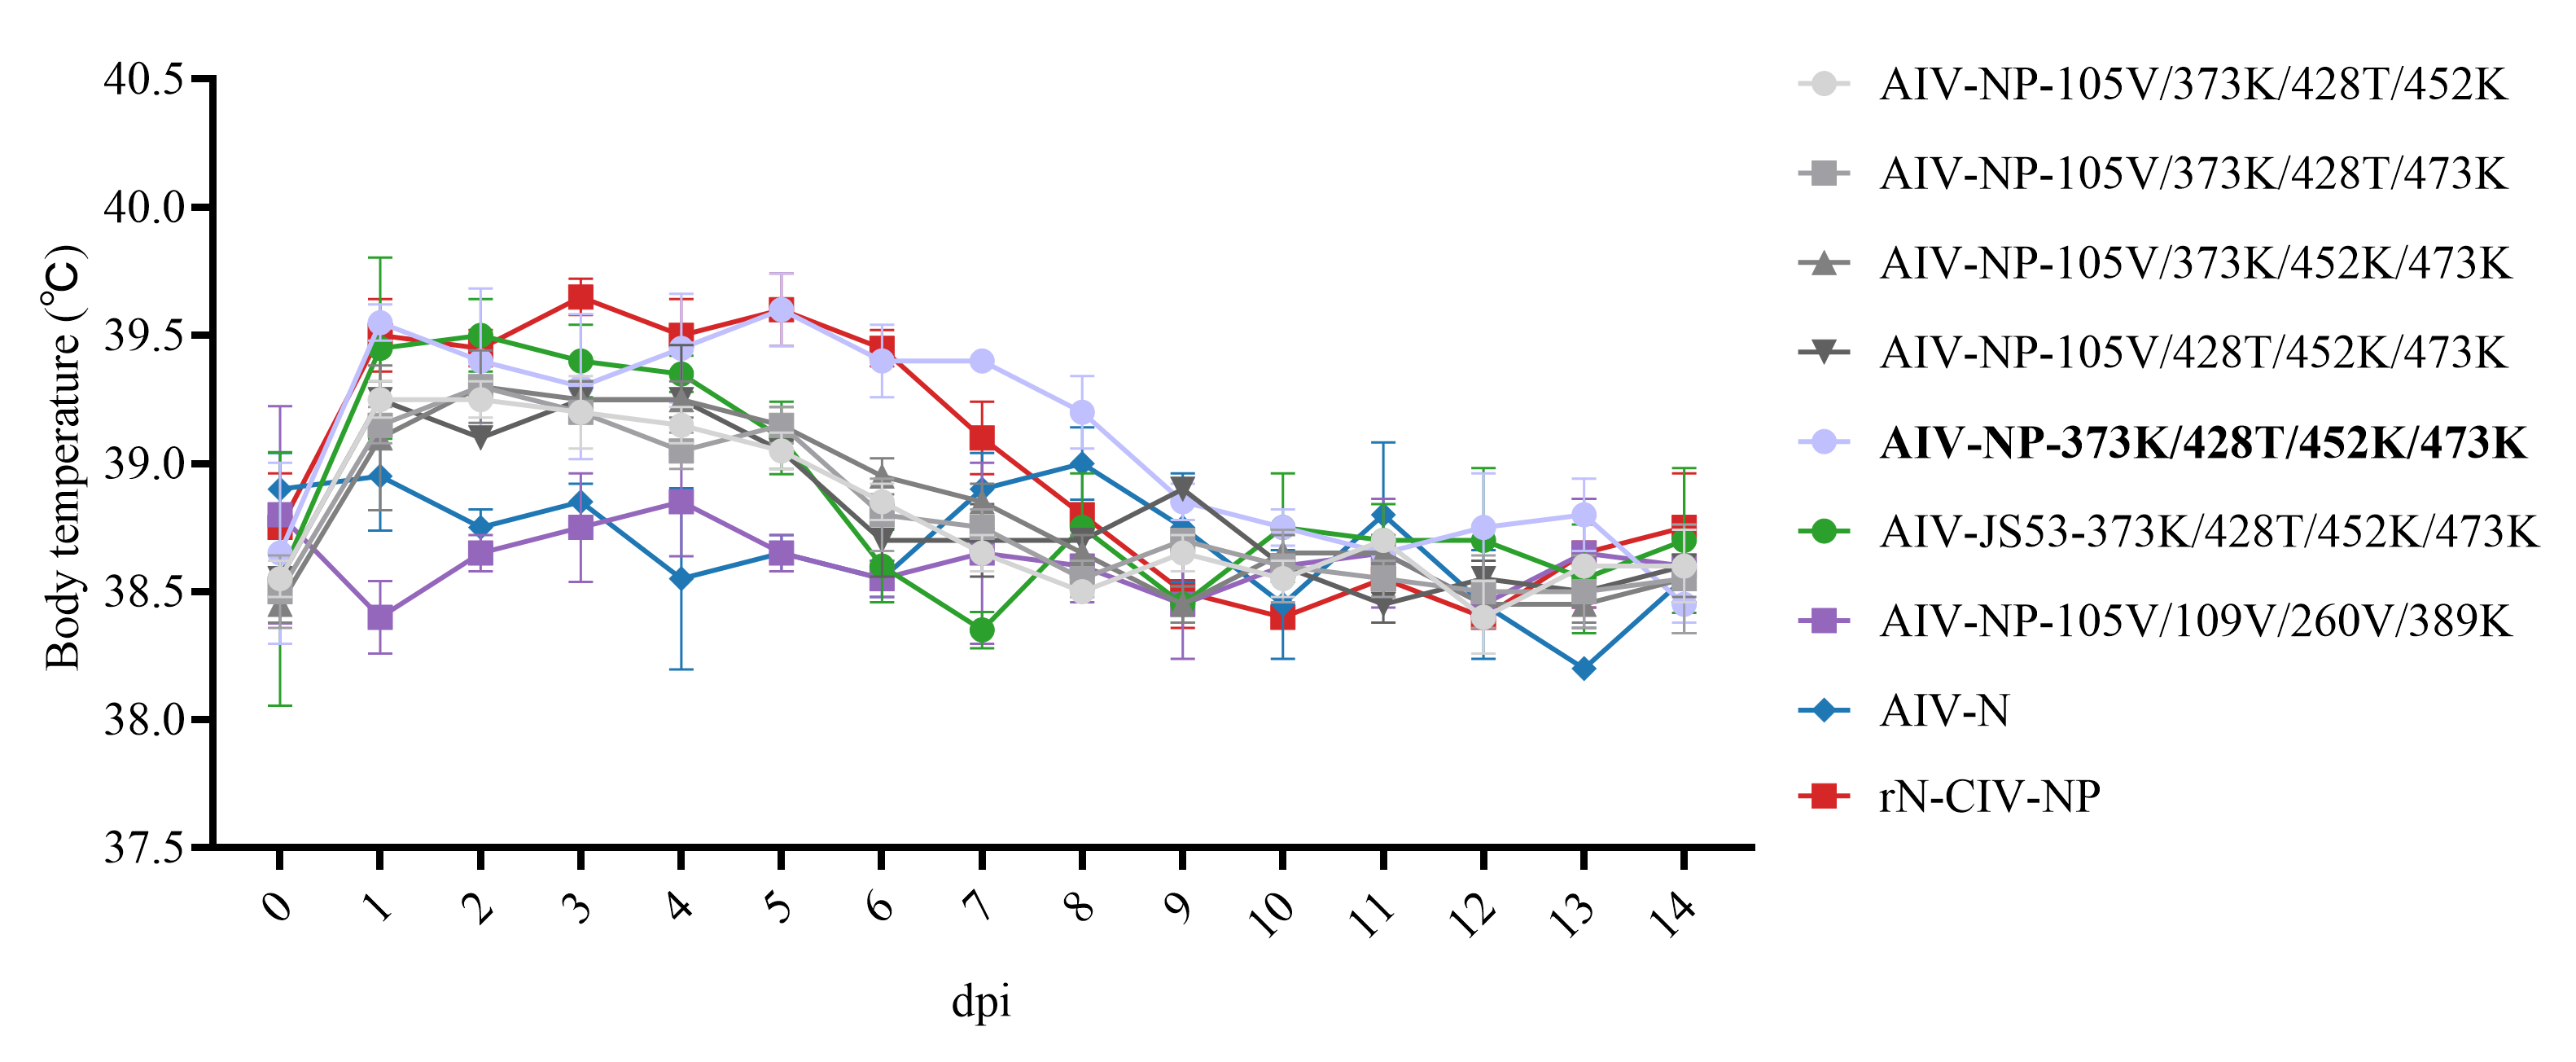


**Figure S3. Body temperature profiles of dogs following viral challenge.**

Daily rectal temperatures were monitored for 14 dpi.

(A) Body temperature of dogs inoculated with AIV-N and CIV-GD06.

(B) Body temperature of dogs inoculated with segment-reassortant viruses.

(C) Body temperature of dogs inoculated with NP single-mutant viruses.

(D) Body temperature of dogs inoculated with NP double-mutant viruses.

(E) Body temperature of dogs inoculated with NP triple-mutant viruses.

(F) Body temperature of dogs inoculated with the NP quadruple-mutant virus.
