# Supplementary material
Source: Research Square preprint supplement (doi:10.21203/rs.3.rs-8797160/v1)
Supplement: Supplementary file 5 [file f3daca26cef5f2e483d1a0d9.docx]

A
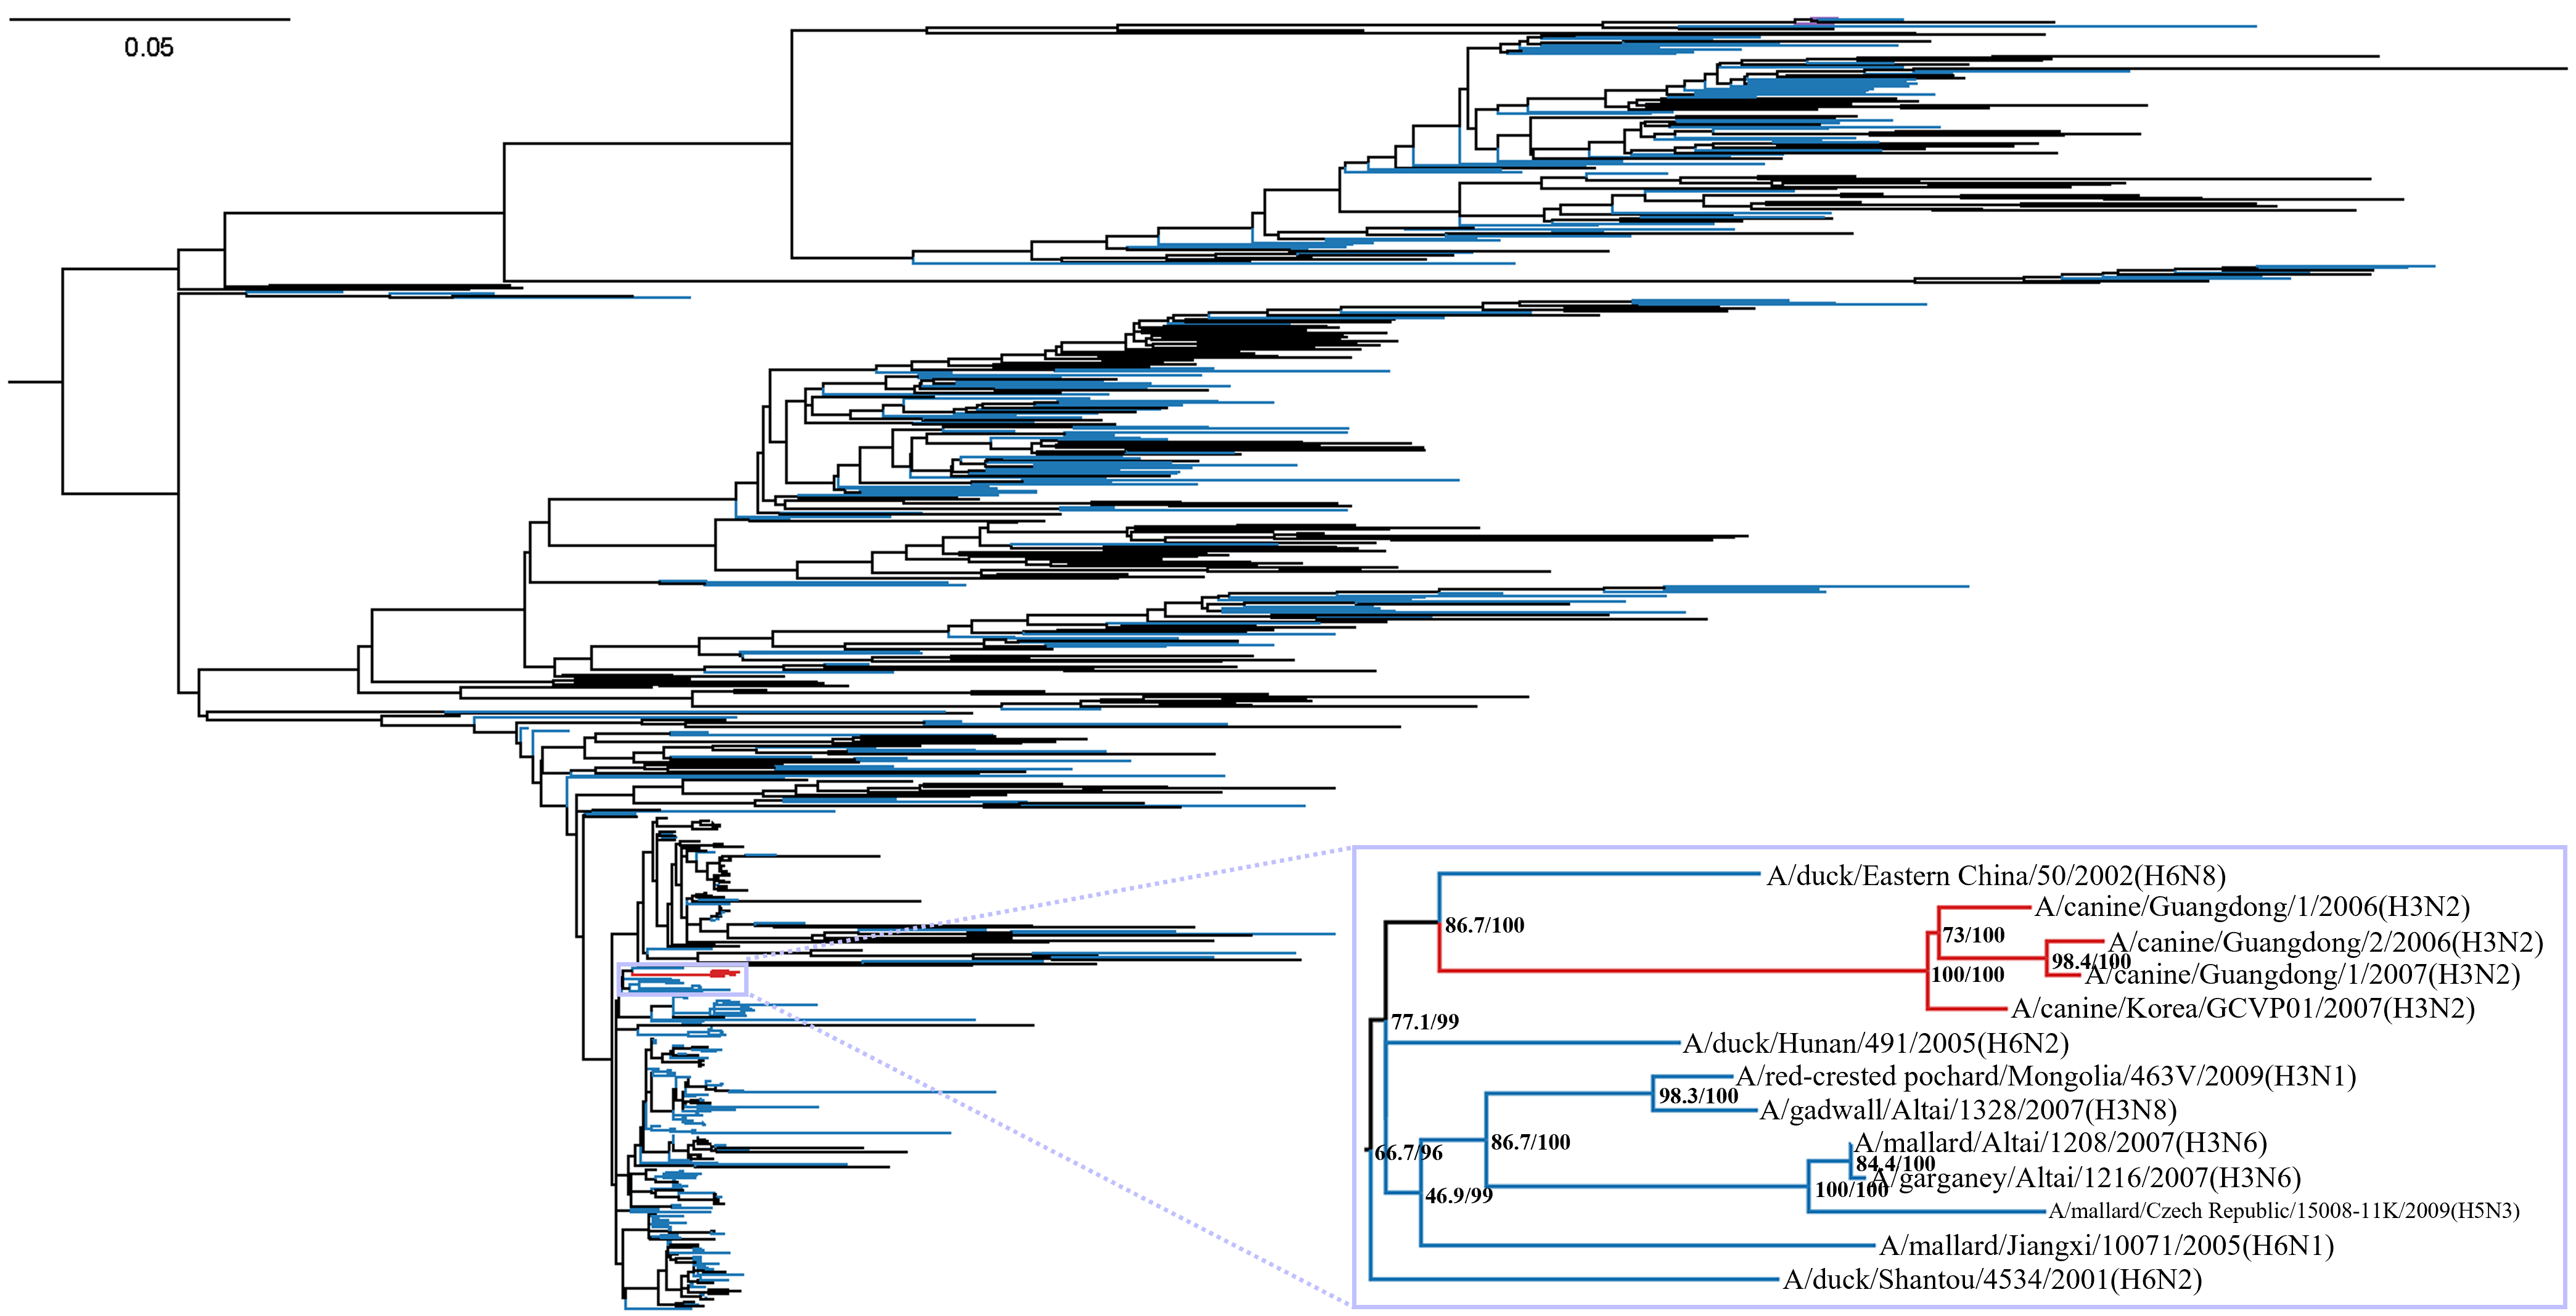


B
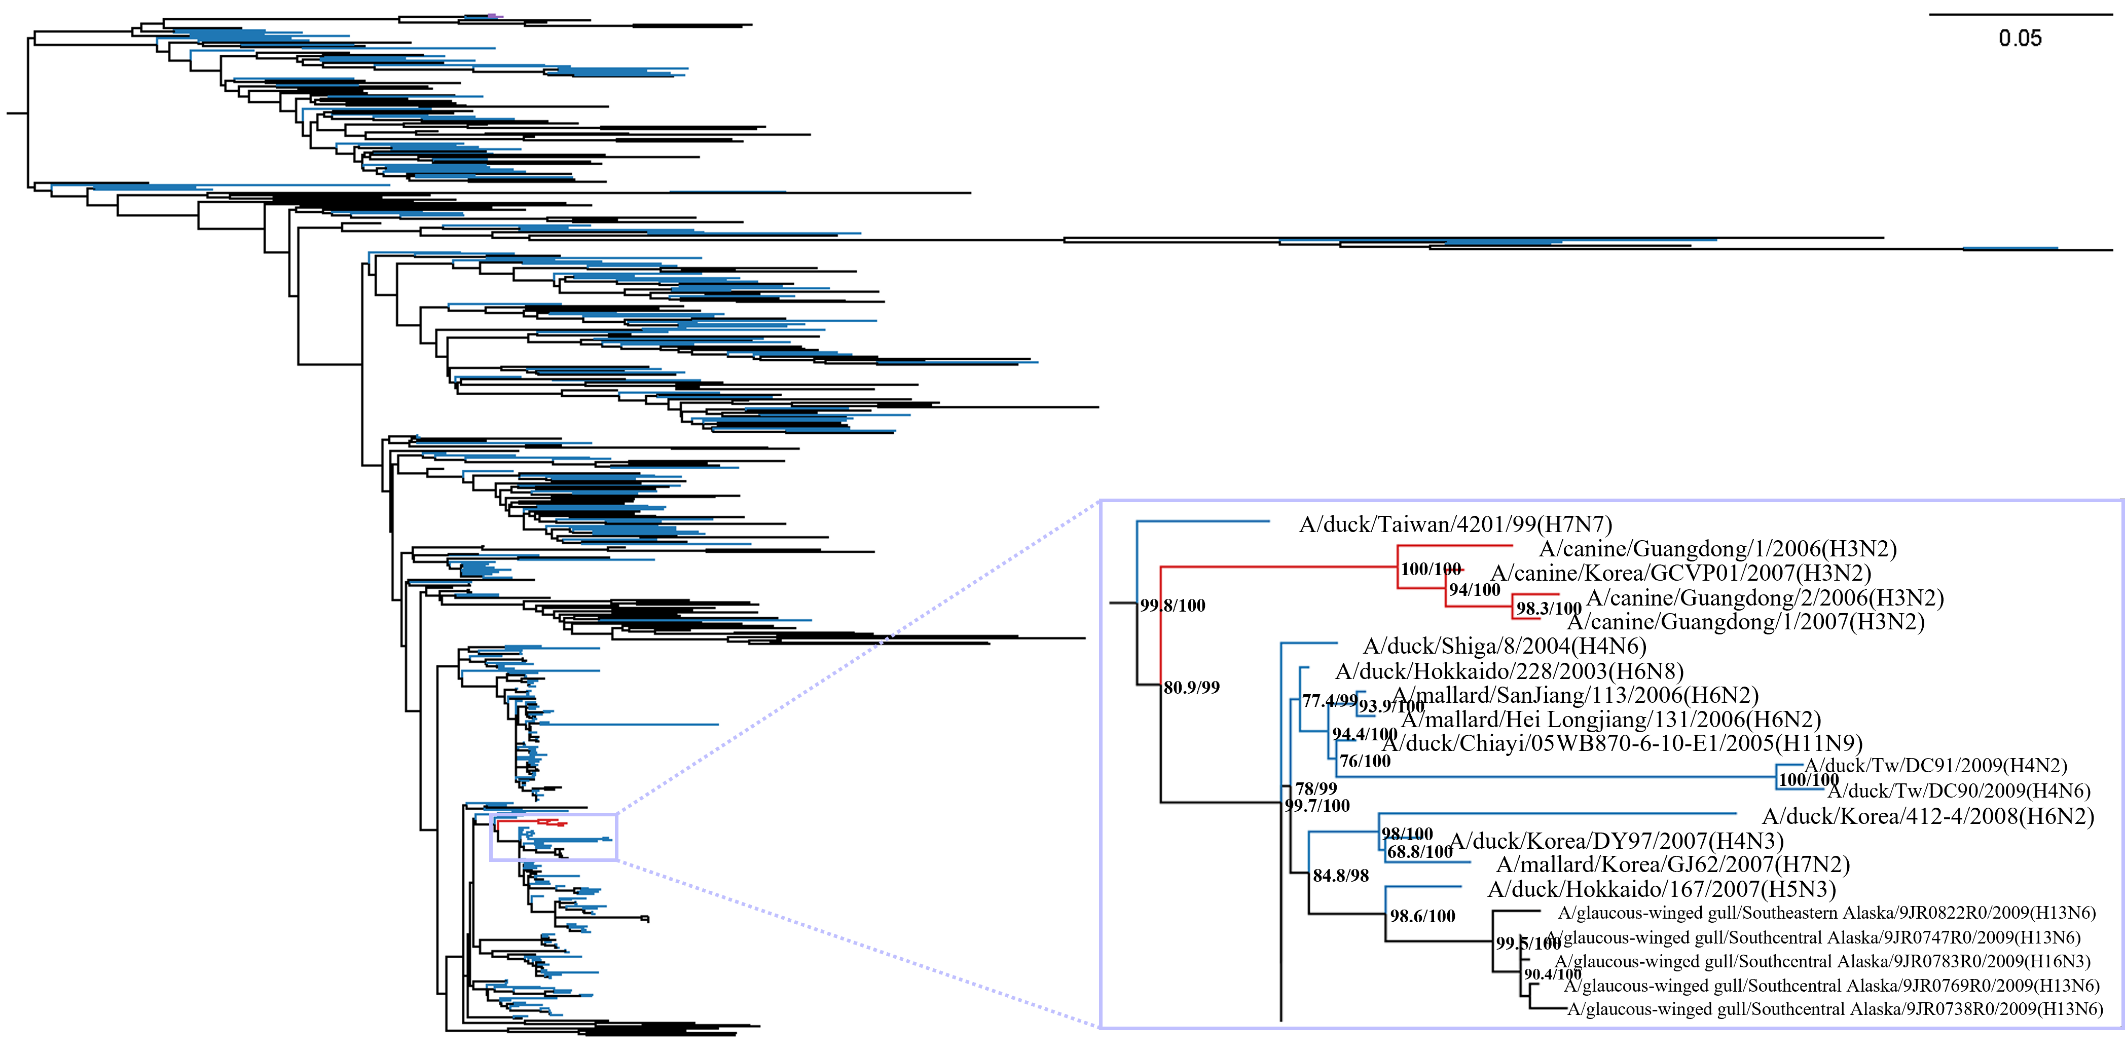


C
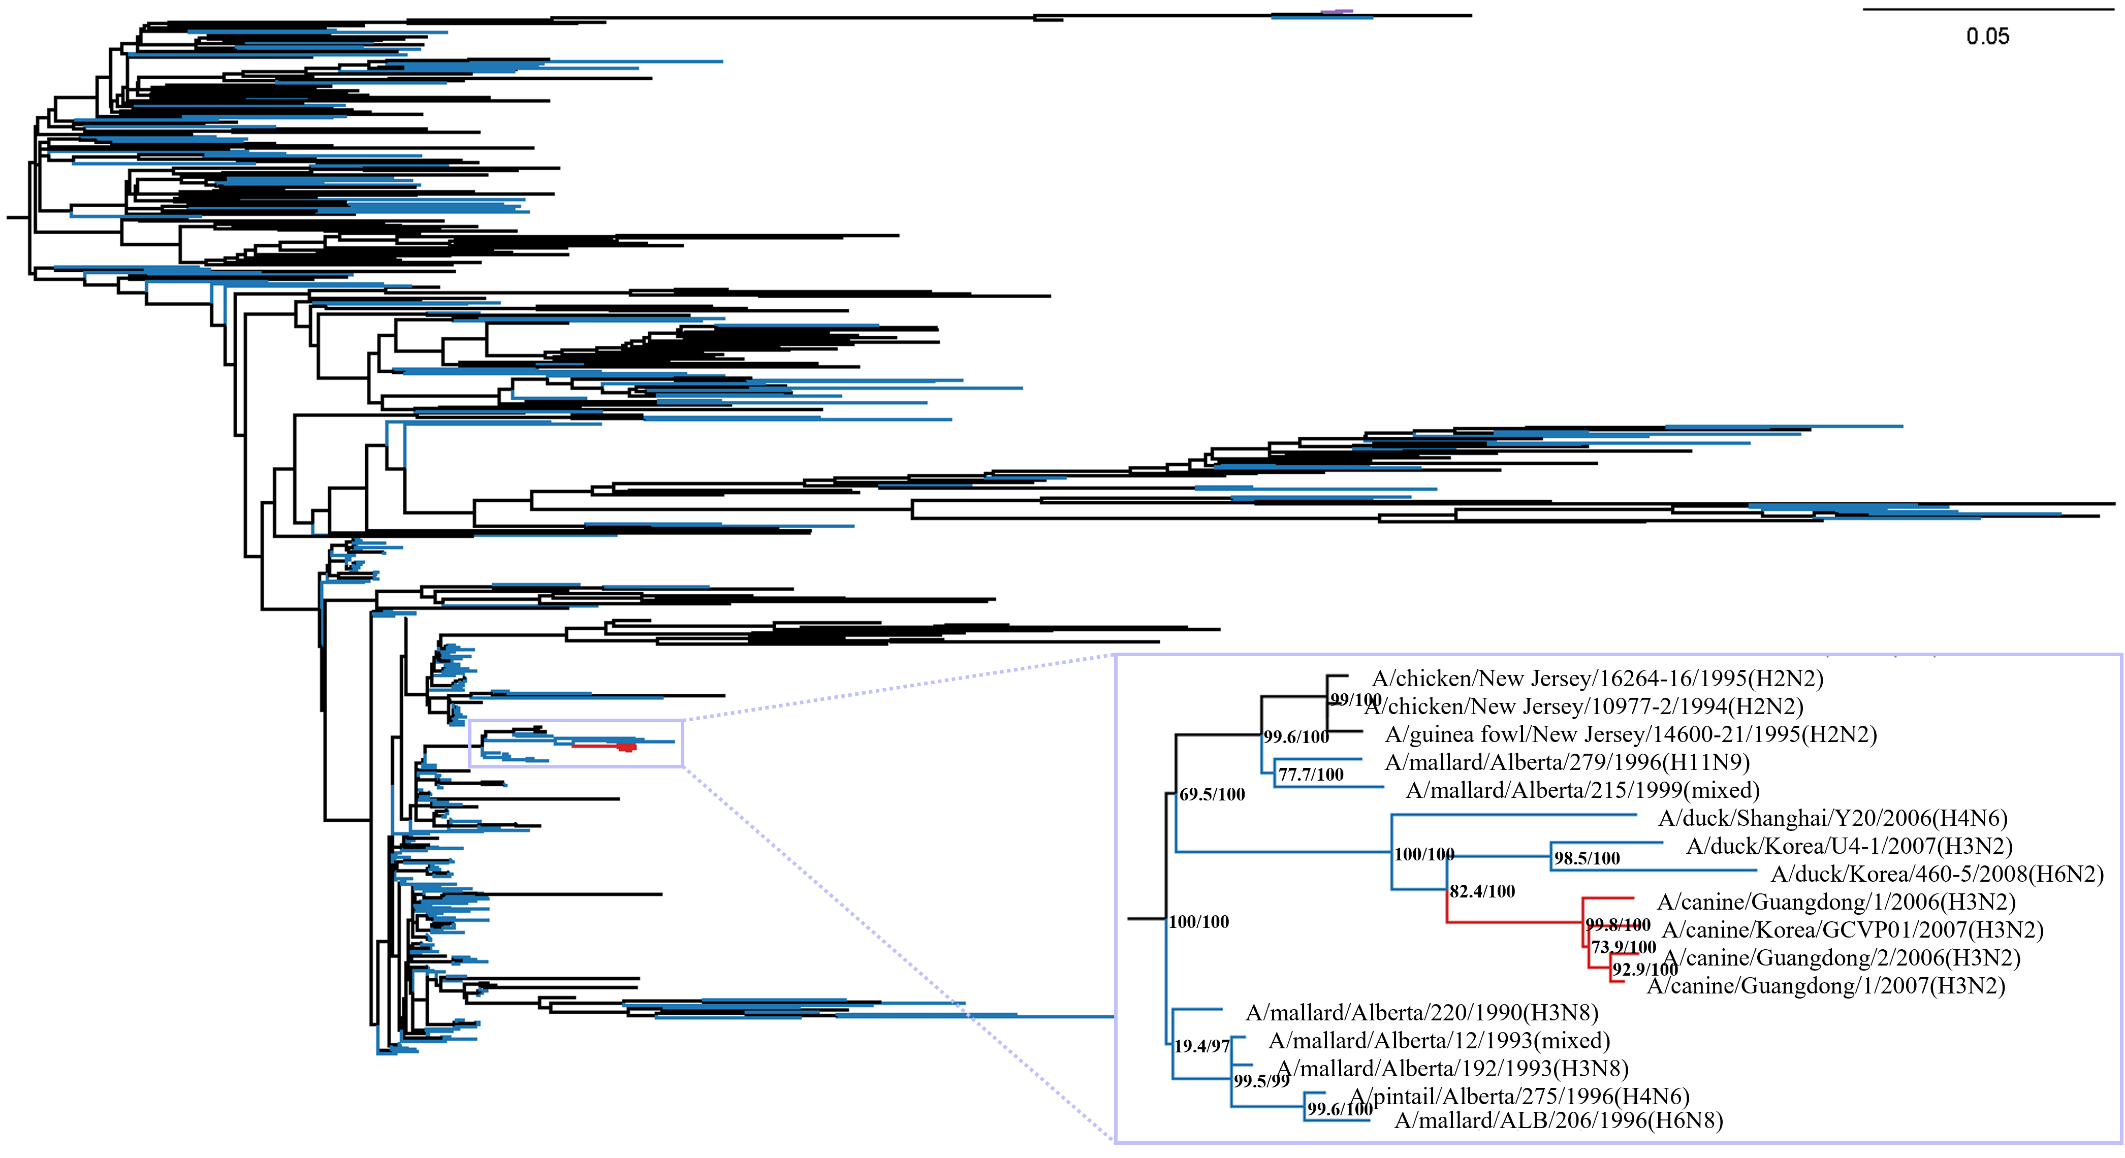


D


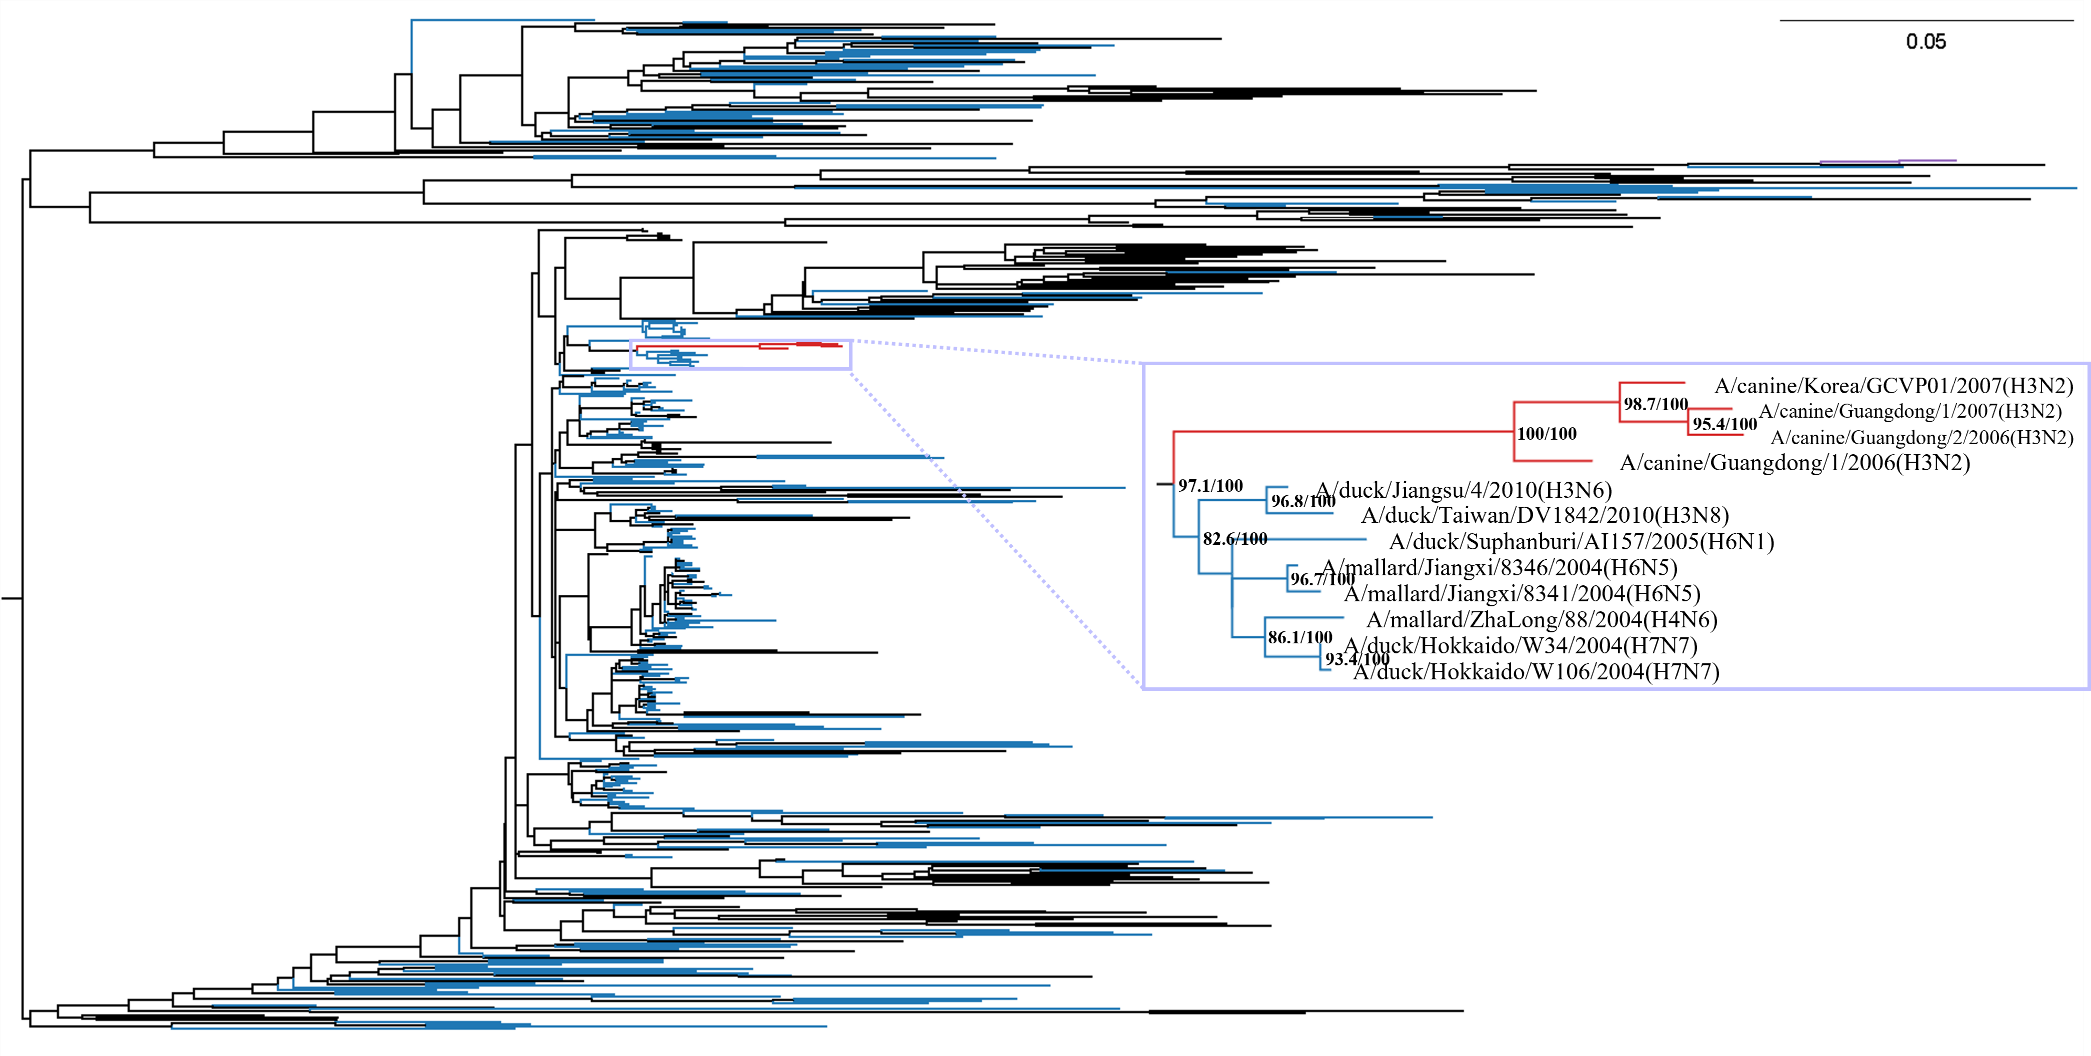


E
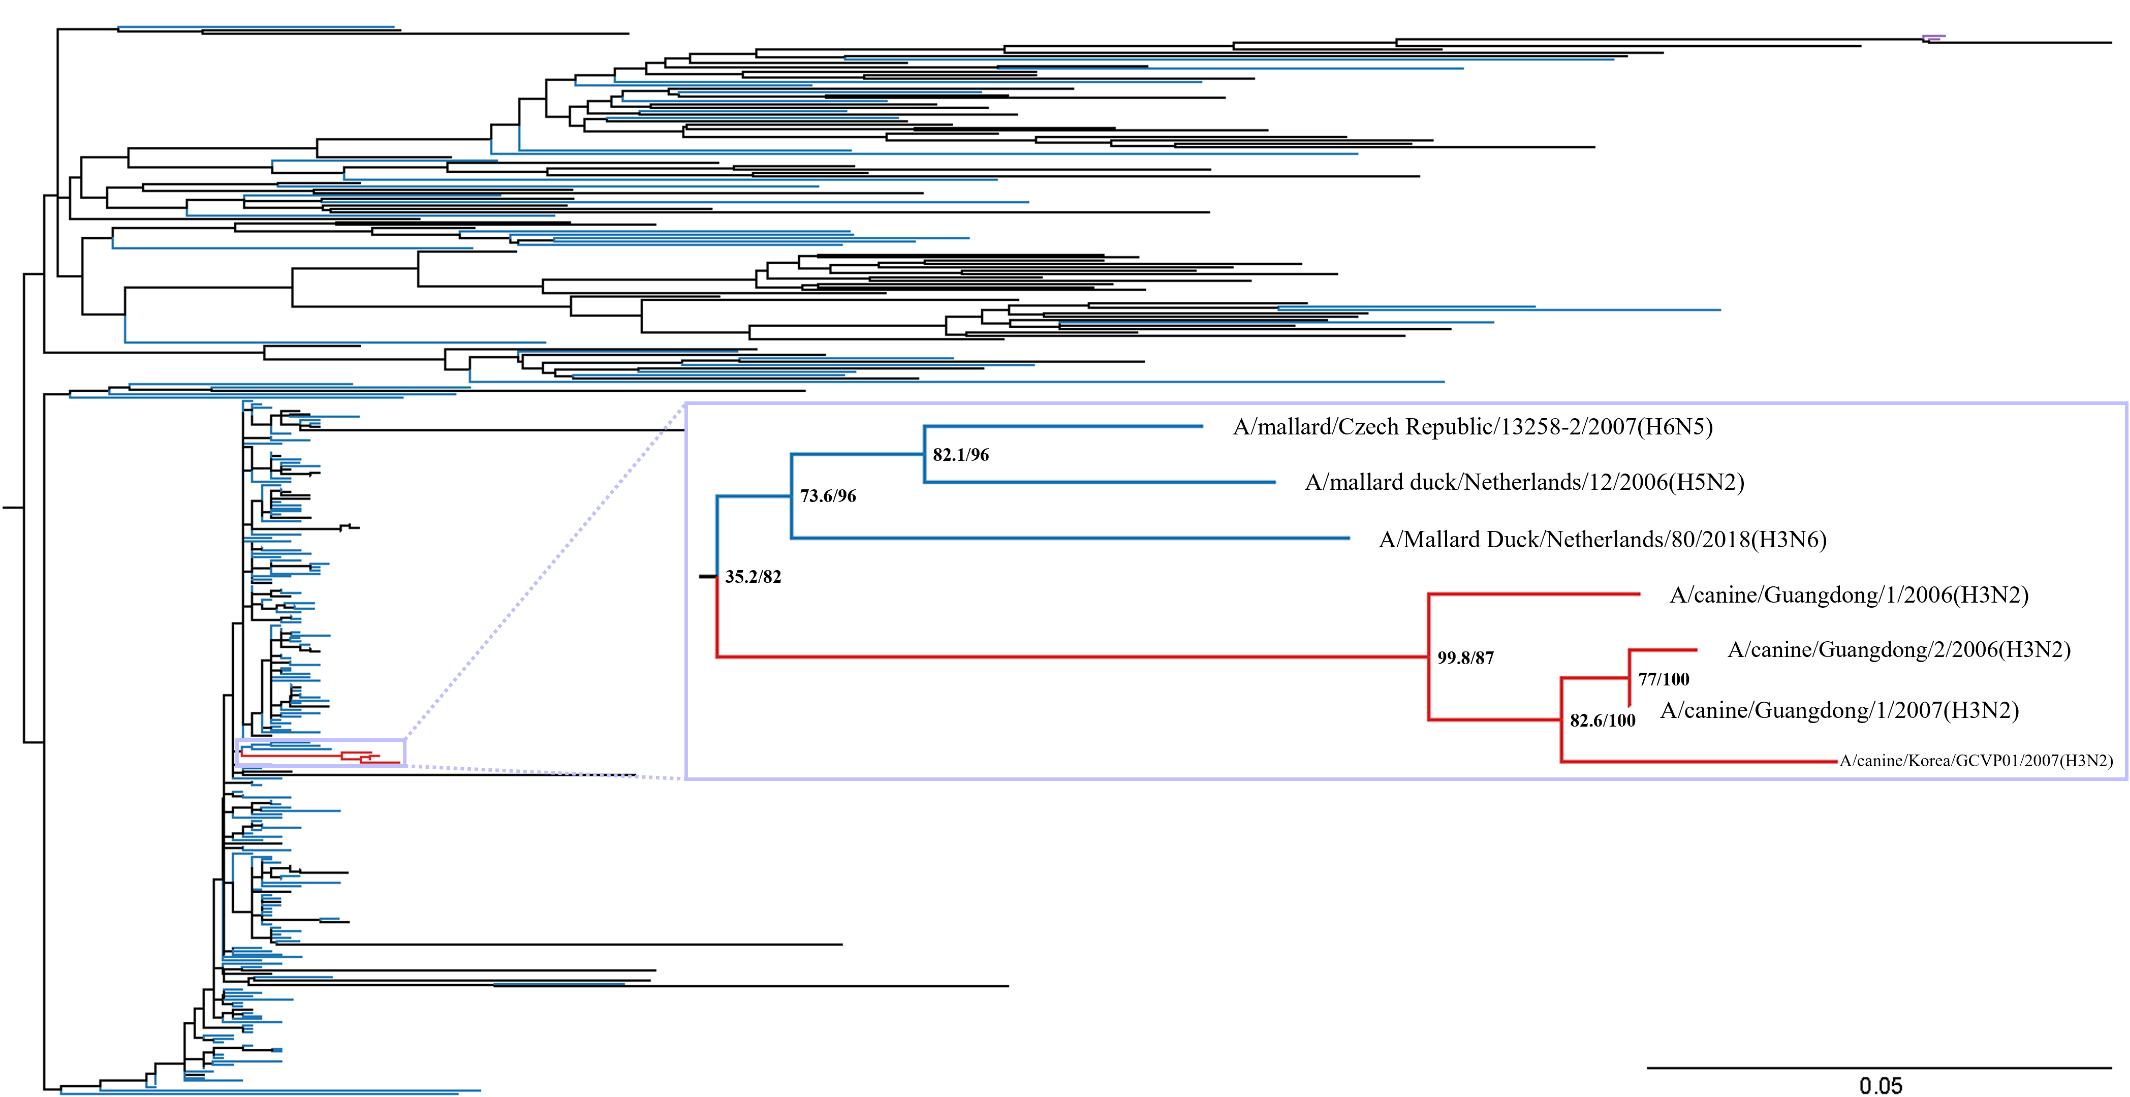


F


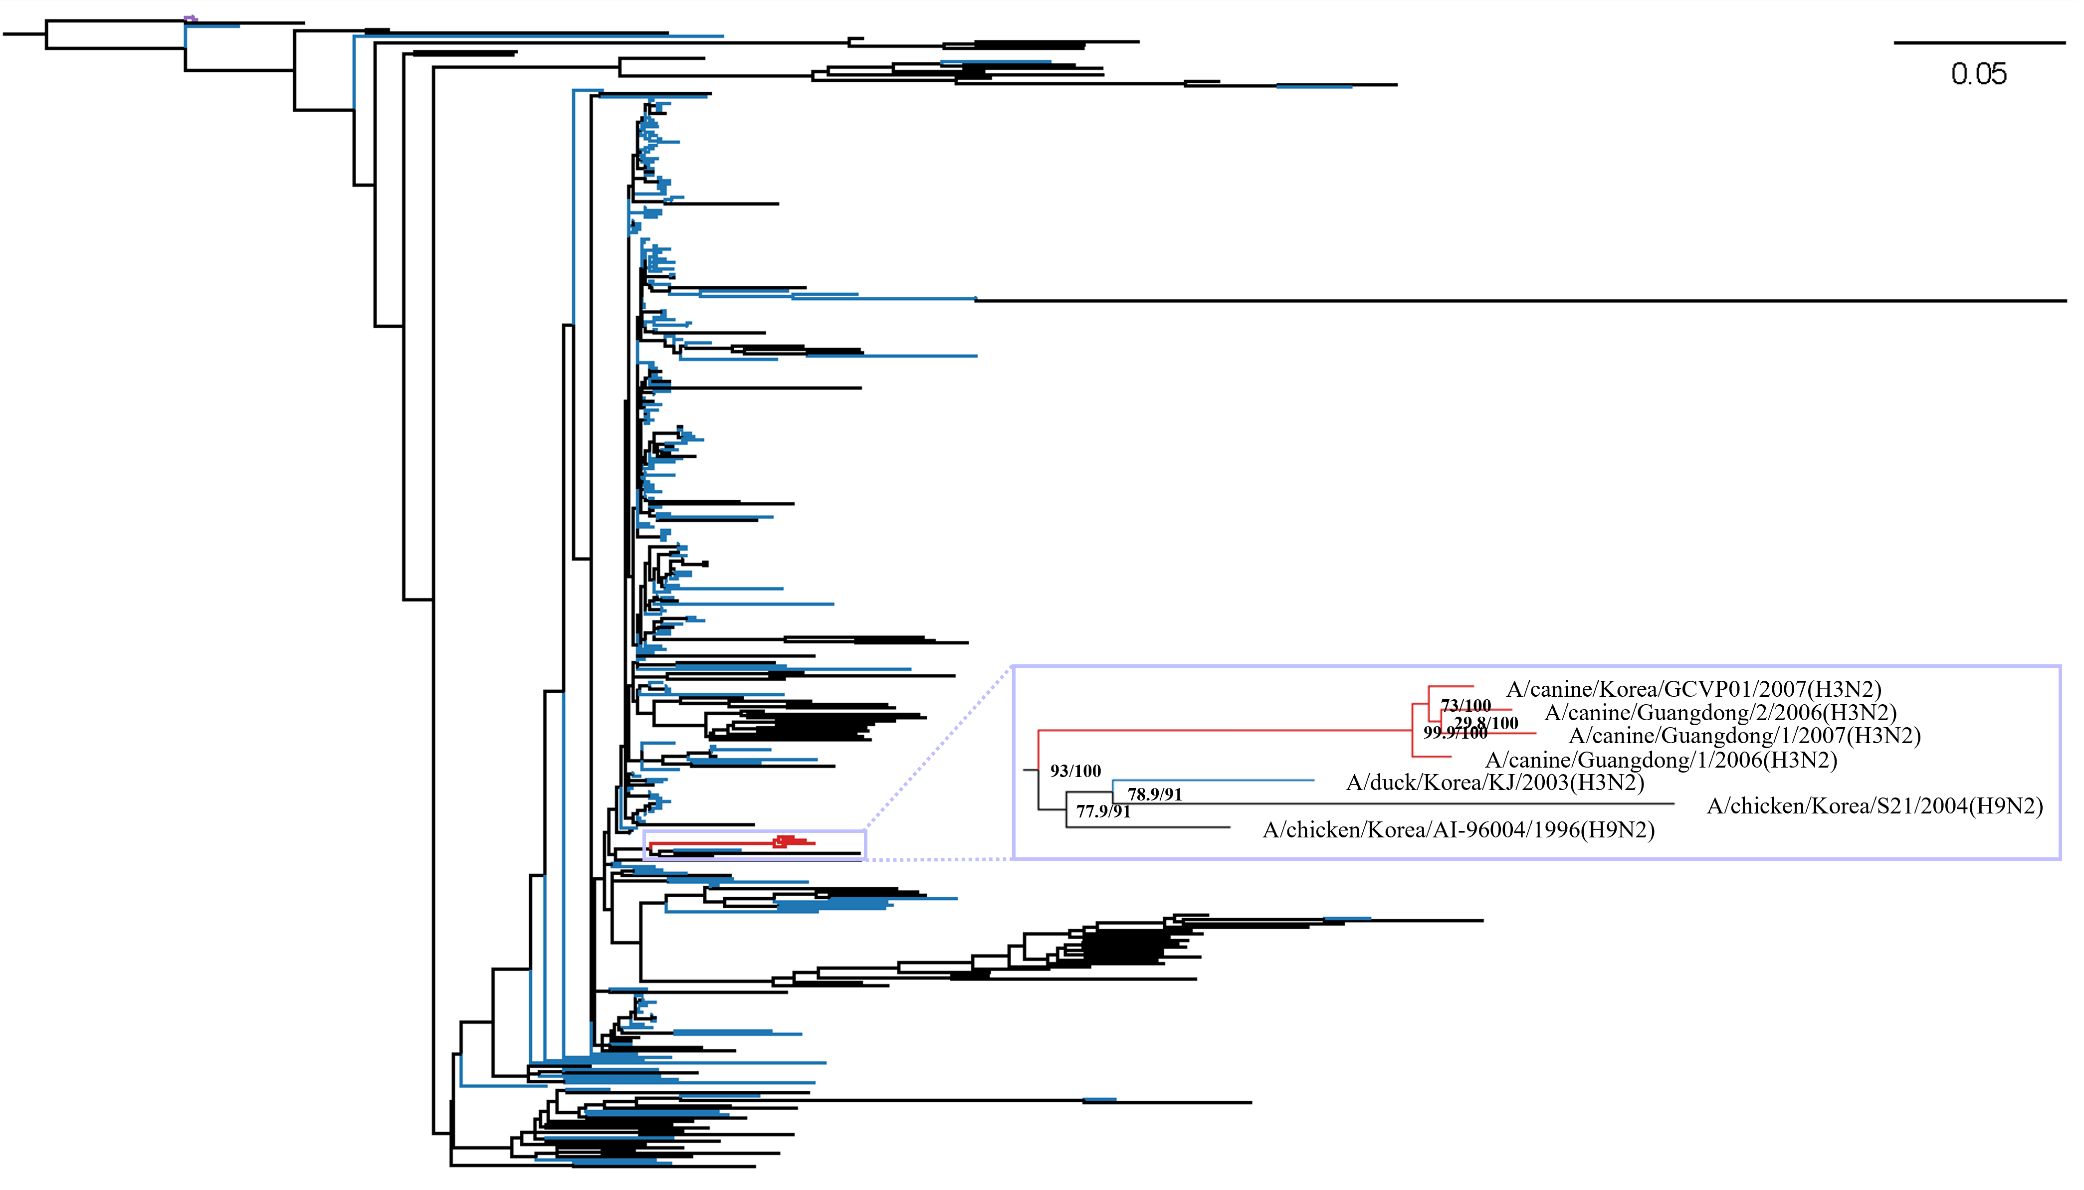


**Figure S1. Phylogenetic analysis of the internal gene segments of H3N2 CIV.**

(A) Phylogenetic tree of the PB2 gene segment.

(B) Phylogenetic tree of the PB1 gene segment.

(C) Phylogenetic tree of the PA gene segment.

(D) Phylogenetic tree of the NP gene segment.

(E) Phylogenetic tree of the M gene segment.

(F) Phylogenetic tree of the NS gene segment.

The trees illustrate the evolutionary relationships between H3N2 CIV and related AIV lineages. Branch colors represent different lineages: red, H3N2 CIV; deep purple, human H3N2 influenza viruses; blue, AIV strains from Anatidae; and black, AIV strains from other avian species. Numerical values at key nodes indicate UFBoot support and SH-aLRT percentages, respectively.
