# Supplementary material
Source: Research Square preprint supplement (doi:10.21203/rs.3.rs-8797160/v1)

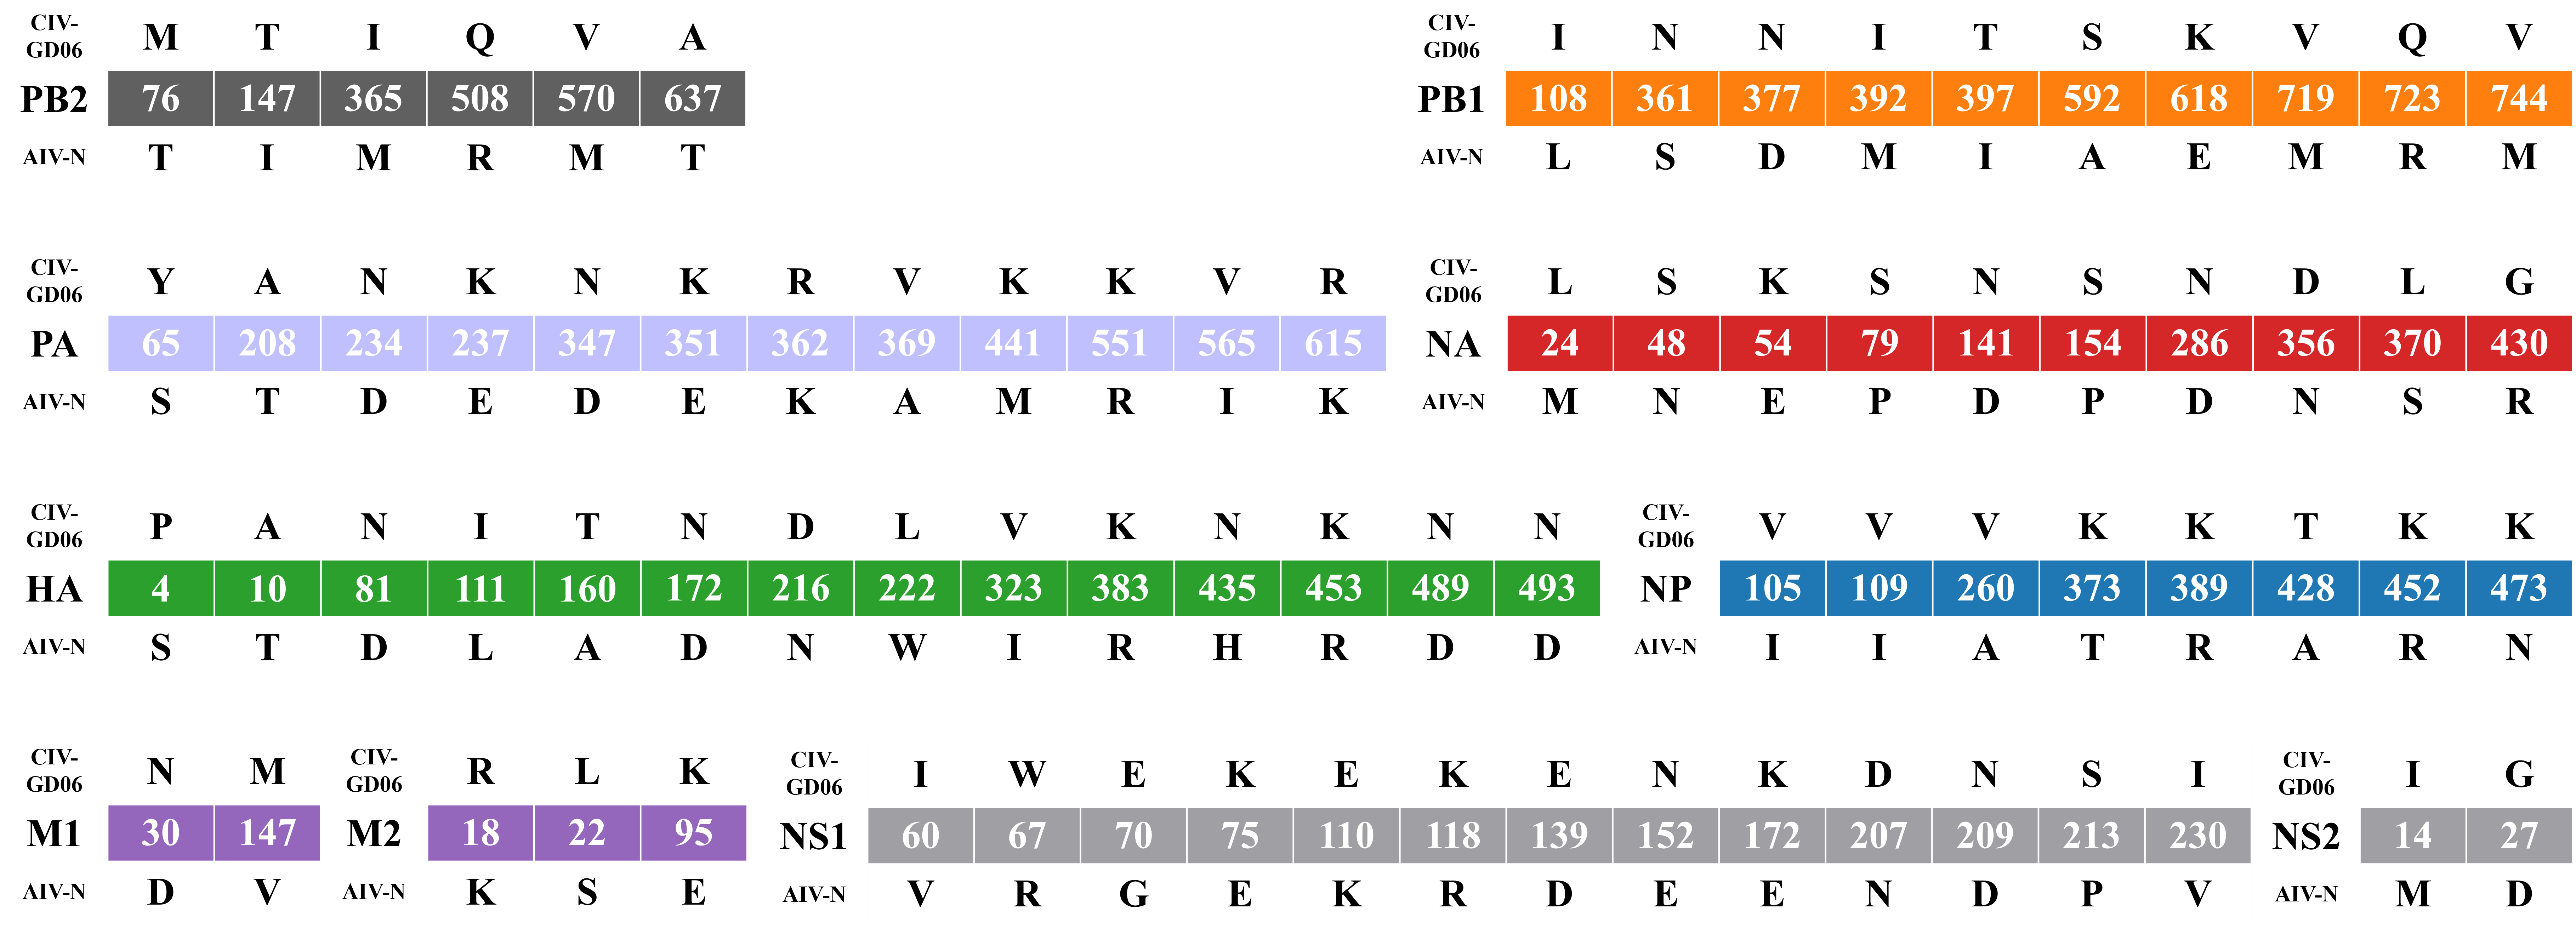


Figure S2. Specific amino acid sequence variations between AIV-N and CIV-GD06.

Supplement: Supplementary file 1 [file 2100b3c8297fb6c68f04380a.docx]

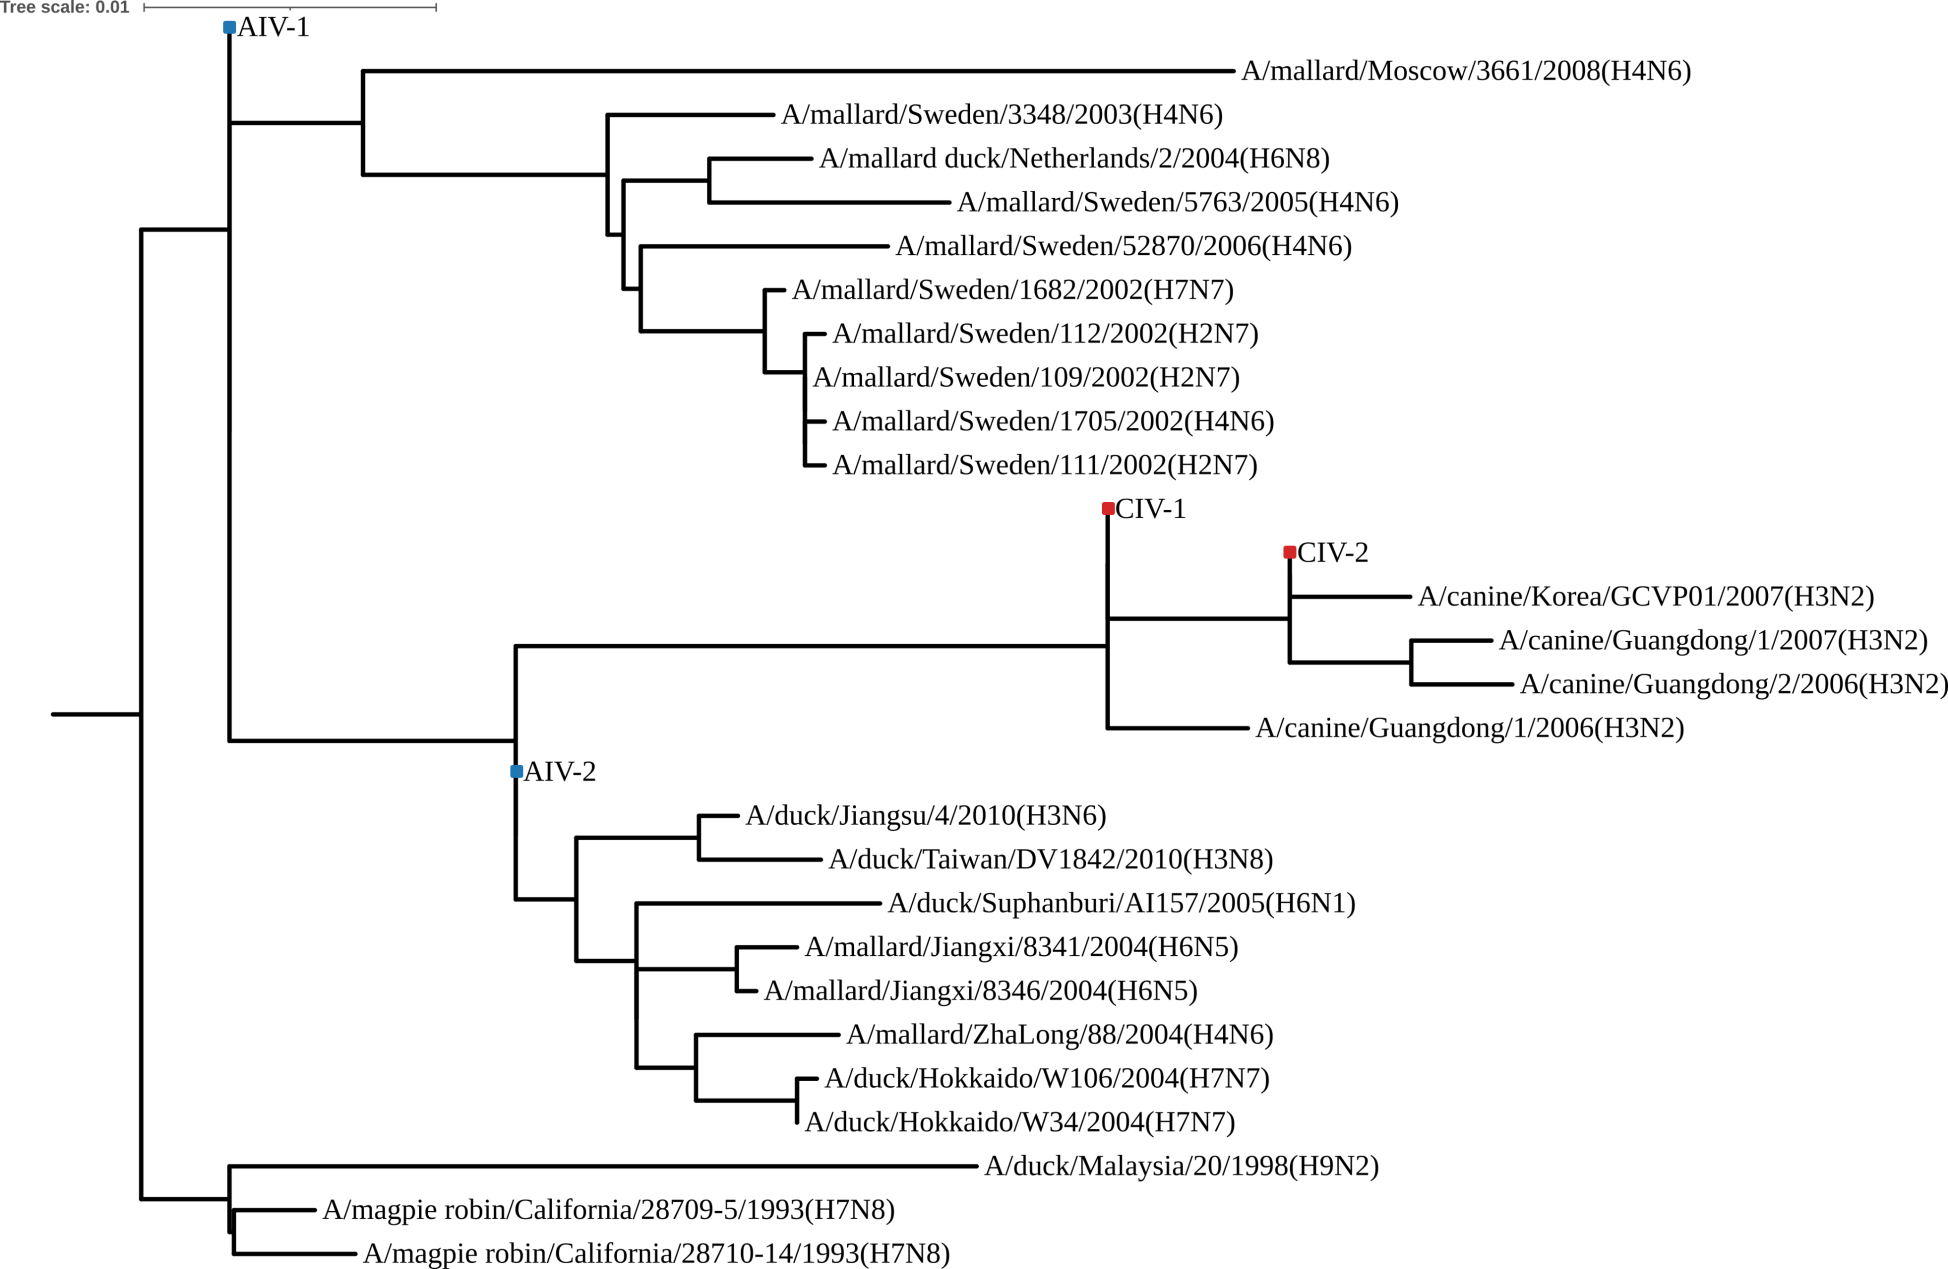


Figure S4. **Topological validation of the reconstructed ancestral NP sequences.**

Supplement: Supplementary file 3 [file 57d07daf3852bd6076248b48.docx]
